1 **Metformin modulates microbiota-derived inosine and ameliorates**  
2 **methamphetamine-induced anxiety and depression-like withdrawal**  
3 **symptoms in mice**

4  
5 **Jiqing Yang<sup>1,2,3,4,#</sup>, Zunyue Zhang<sup>1,4,#</sup>, Zhenrong Xie<sup>1,4</sup>, Ling Bai<sup>2</sup>, Pu Xiong<sup>1,4</sup>, Fengrong**  
6 **Chen<sup>1,4</sup>, Tailin Zhu<sup>5</sup>, Qingyan Peng<sup>1,4</sup>, Hongjin Wu<sup>1,4</sup>, Yong Zhou<sup>1,4</sup>, Yuru Ma<sup>1,4</sup>, Yongjin**  
7 **Zhang<sup>1,4</sup>, Minghui Chen<sup>1,4</sup>, Jianyuan Gao<sup>1,4</sup>, Weiwei Tian<sup>1</sup>, Kai Shi<sup>6</sup>, Yan Du<sup>2</sup>, Yong**  
8 **Duan<sup>2</sup>, Huawei Wang<sup>1</sup>, Yu Xu<sup>1,7</sup>, Yi-Qun Kuang<sup>1,4</sup>, Juehua Yu<sup>1,4,\*</sup>, Kunhua Wang<sup>1,3,8,\*</sup>**

- 9  
10 1. NHC Key Laboratory of Drug Addiction Medicine, First Affiliated Hospital of Kunming  
11 Medical University, Kunming, 650032, China;  
12 2. Department of Clinical Laboratory, the First Affiliated Hospital of Kunming Medical  
13 University, Kunming, 650032, China;  
14 3. Faculty of Life science and Technology, Kunming University of Science and Technology,  
15 Kunming, 650500, China;  
16 4. Centre for Experimental Studies and Research, First Affiliated Hospital of Kunming  
17 Medical University, Kunming, 650032, China;  
18 5. Ministry of Education-Shanghai Key Laboratory for Children's Environmental Health,  
19 Xinhua Hospital Affiliated to Shanghai Jiao Tong University School of Medicine, Shanghai  
20 200092, China;  
21 6. College of Science, Guilin University of Technology, Guilin, 541004, China;  
22 7. Department of Gastrointestinal Surgery, the First Affiliated Hospital of Kunming Medical  
23 University, Kunming, 650032, China;  
24 8. Yunnan University, Kunming, 650032, China.

25 # These authors contributed equally: Jiqing Yang and Zunyue Zhang

26 \* Corresponding authors ([juehuayu@gmail.com](mailto:juehuayu@gmail.com); [wangkunhua1@163.com](mailto:wangkunhua1@163.com))

27

28 **ABSTRACT**

29 **Objective** Metformin exhibits therapeutic potential in behavioural deficits induced by  
30 methamphetamine (METH) in rats. Emerging studies suggest gut microbiota may impact  
31 psychiatric symptoms, but there is no direct evidence supporting metformin's participation in  
32 the pathophysiology of withdrawal symptoms via modulation of gut microbiota.

33

34 **Methods** In order to define the functional contributions by gut microbiota and metformin to  
35 the behavioural deficits during METH withdrawal, we utilized a combination of fecal

1 microbiota transplantation (FMT), high-throughput sequencing, and untargeted metabolomics  
2 technologies.

3

4 **Results** First, METH addicts exhibited higher  $\alpha$  diversity and distinct microbial structures  
5 compared to heathy controls. In particular, the relative abundance of *Rikenellaceae* was  
6 positively correlated with the severity of anxiety and depression. Second, both  
7 human-to-mouse and mouse-to-mouse FMTs confirmed that METH-altered-microbiota  
8 transplantation is sufficient to promote anxiety and depression-like behaviours in recipient  
9 germ-free mice, and these behavioural disturbances could be ameliorated by metformin.  
10 In-depth analysis revealed that METH significantly altered the bacterial composition and  
11 structure as well as relative abundance of several bacterial taxa and metabolites, including  
12 *Rikenellaceae* and inosine, respectively, whereas add-on metformin could remodel these  
13 alterations. Finally, the inosine complementation successfully restored METH-induced  
14 anxiety and depression-like behaviours in mice.

15

16 **Discussion** This study demonstrates that METH withdrawal-induced anxiety and  
17 depression-like behaviours are convertible and transmissible via gut microbiota in a mouse  
18 model. The therapeutic effects of metformin on psychiatric manifestations are associated with  
19 microbiota-derived metabolites, highlighting the role of the gut microbiota in substance use  
20 disorders and the pathophysiology of withdrawal symptoms.

21

## 22 **KEYWORDS**

23 Methamphetamine, withdrawal, gut microbiota, metformin, inosine

24

25

26

27

28

29

30

31

32

33

34

35

36

1 **Study Highlights**

2

3 **What is known?**

- 4 • There are no targeted therapies for substance withdrawal syndrome, but there is  
5 considerable evidence that withdrawal-associated psychiatric manifestations  
6 contribute to the poor adherence to rehabilitation treatment as well as the relapse  
7 rates.
- 8 • Metformin has shown its therapeutic potential against METH-induced  
9 neurobehavioural changes and neurodegeneration in rats through CREB/BDNF and  
10 Akt/GSK3 signaling pathways in the anxiety-related brain nuclei.

11

12 **What is new here?**

- 13 • METH withdrawal-induced anxiety and depression-like behaviours are convertible  
14 and transmissible via gut microbiota in a mouse model.
- 15 • The therapeutic effects of metformin on psychiatric manifestations are associated  
16 with microbiota derived metabolites.
- 17 • Inosine complementation could restore METH withdrawal-induced anxiety and  
18 depression-like behaviours.

19

## 1 INTRODUCTION

2 Methamphetamine (METH) is a potent and long-lasting central nervous system (CNS)  
3 stimulant, which is associated with high rates of personal and community harm and remains  
4 one of the major public health issues worldwide [1]. Numerous studies have shown that the  
5 chronic administration of METH and its abrupt discontinuation cause substance withdrawal  
6 syndrome with a series of severe neurobehavioural disturbances including a depressed,  
7 anxious, and irritable mood, and difficulty concentrating [2, 3]. Among them, anxiety and  
8 depression are the most common psychiatric symptoms emerging during both the METH  
9 intoxication and withdrawal stages [4, 5]. Although the prevalence of such psychiatric  
10 symptoms has not been well studied in METH-using populations, a few investigations  
11 established that over three quarters of chronic METH users [6] and nearly 40% of  
12 treatment-seeking METH users [7] reported anxiety and/or depression. To date, there are no  
13 targeted therapies for substance withdrawal syndrome, but there is considerable evidence that  
14 withdrawal-associated psychiatric manifestations contribute to the poor adherence to  
15 rehabilitation treatment as well as the relapse rates.

16 Mood, cognition, memory, and personality were originally believed to be exclusively  
17 modulated by the CNS. However, it is now becoming clear that many extra-neuronal factors,  
18 such as the immune system and the gut microbiota that reside in the gastrointestinal tract,  
19 could regulate neurological function and have been associated with cognitive  
20 neuropsychology and psychosocial functioning [8, 9]. Recently, accumulating clinical and  
21 experimental evidence suggest that the alteration of gut microbiota regulates the synthesis of  
22 neuroactive molecules and central neurotransmitters, such as  $\gamma$ -aminobutyric acid (GABA),  
23 serotonin, dopamine, and melatonin, and therefore may play critical roles in the pathogenesis  
24 of anxious and depressive symptoms in neurodegenerative and neuropsychiatric disorders.  
25 For example, the gut microflora of patients with Parkinson's disease contained high levels of  
26 *Rikenellaceae* compared to corresponding healthy controls (HCs) and the genera *Turicibacter*  
27 and *Prevotella* were significantly correlated with the disease severity scores [10]. The spatial  
28 expression pattern of the GABA receptor in the brain could be altered by chronic treatment  
29 with *Lactobacillus rhamnosus*, which in turn reduces stress-induced corticosterone levels and  
30 depression-like behaviours [11, 12]. In addition, mice that received the fecal microbiota  
31 associated with major depressive disorder exhibited depression-like behaviours and  
32 disturbances of microbial genes and host metabolites [13]. More recently, it has been reported  
33 that the gut-derived isovaleric acid, which is positively correlated with salivary cortisol and  
34 depression in boys, could cross the blood–brain barrier and interfere with synaptic  
35 neurotransmitter release [14]. Based on these intriguing findings, we hypothesized that the  
36 dysbiosis of gut microbiota may participate in the development of psychiatric symptoms in  
37 the context of METH addiction and withdrawal via the microbiota-gut-brain axis.

38 Metformin is a biguanide and it is the most prescribed drug for the treatment of individuals

1 with type 2 diabetes mellitus due to its safety and its glucose-lowering effects [15].  
2 Metformin has also been shown to be beneficial in several other conditions, such as cancer,  
3 cardiovascular disease, and neurodegenerative disease [16]. A recent study also showed that  
4 metformin could act against METH-induced neurobehavioural changes and  
5 neurodegeneration in rats because of its direct activation of the cAMP response element  
6 binding protein (CREB)/brain-derived neurotrophic factor (BDNF) and protein kinase B  
7 (Akt)/glycogen synthase kinase 3 (GSK3) signalling pathways in the anxiety-related brain  
8 nuclei [17]. Mechanistically, metformin is well-tested *in vitro* and *in vivo* and an approved  
9 compound that targets diverse pathways including mitochondrial energy production and  
10 insulin signaling [18]. In addition, liver, muscle and adipose tissue are classic sites of  
11 metformin action, and there is growing evidence from both rodent and human studies  
12 suggesting that the gut microbiota might represent another key target involved in the  
13 antidiabetic and other possible beneficial effects of metformin [19, 20]. For example,  
14 metformin has been proved to modulate gut microbiota composition and structure through  
15 increasing mucin-degrading *Akkermansia muciniphila* as well as short chain fatty  
16 acid-producing microbiota in patients with diabetes [21]. However, there is no direct evidence  
17 supporting that the gut microbiota would be modulated by metformin and become an  
18 alternative route participating in the development of substance withdrawal symptoms, and its  
19 mechanisms of action remain to be clarified.

20 In order to explore the effects of metformin on gut microbiota, microbial metabolism, and  
21 neurobehavioural symptoms induced by METH exposure, we sought to define functional  
22 contributions by metformin and gut microbiota to the behavioural abnormalities associated  
23 with METH withdrawal, using a combination of fecal microbiota transplantation (FMT),  
24 high-throughput sequencing, and untargeted metabolomics technologies, and most  
25 importantly, to pinpoint the underlying interactions and molecular mechanisms of metformin  
26 in microbiota-gut-brain axis in the context of METH addiction and withdrawal.

27

## 28 **MATERIALS & METHODS**

### 29 **Ethics statement and clinical sample collection**

30 Fifteen male methamphetamine addicts (MAs) (age ranging from 18-56) during withdrawal  
31 were recruited from the hospital of the sixth Drug Rehabilitation Center in Dehong, China,  
32 and 17 age-matched non-substance using controls with no history of any major disease were  
33 recruited from the local community. The participants' age, gender, body weight, and height  
34 were collected. Fresh fecal samples were collected from the two groups, frozen immediately,  
35 and stored at  $-80^{\circ}\text{C}$  for tests. The participant recruitment, fecal sample collection, and clinical  
36 information collection and usage was approved by the Ethical Committee from Clinical  
37 Research Ethics Committee, the First Affiliated Hospital of Kunming Medical University  
38 (2018-L-42). All participants provided written informed consent for sample and clinical data

1 collection and subsequent analyses prior to study participation.

2

### 3 **Scales**

4 The Self-Rating Anxiety Scale (SAS) and the Self-Rating Depression Scale (SDS) were  
5 used to measure the level of anxiety and depression for MAs and HCs. The reliability and  
6 validity of the Chinese version of these two scales have been confirmed previously [22].  
7 Briefly, both scales contained 20 items and each item was classified as never/rarely,  
8 sometimes, often, or always and assigned a score from 1–4, respectively. The testing score  
9 was calculated by summing the scores for the 20 items and was standardized by multiplying  
10 the sum by 1.25. Scales were measured by experienced a psychological assessor. Higher  
11 scores on the SAS or the SDS indicated a higher level of mental disorder [23].

12

### 13 **Animals**

14 Wildtype male C57BL/6 mice, weighting 20-25g were purchased from Hunan Chushang  
15 Bioscience Company (Hunan, China). Mice were bred in a specific pathogen-free barrier  
16 facility, housed in managed conditions with free access to food and water, and maintained on  
17 a 12-hour light/dark cycle (lights on from 07:00 to 19:00) with experimentation occurring  
18 during the light cycle. We kept a maximum of five mice per cage in our animal facilities for at  
19 least 1 week before use. Research involving mice was approved by the Ethical Committee in  
20 the Research Deputy of Kunming Medical University (2020-471) and was performed in  
21 accordance with NIH guidelines. All animals were randomly assigned into groups.

22

### 23 **Generation of the germ-free mice**

24 Treatment with a cocktail of broad-spectrum antibiotics is commonly used to deplete the  
25 gut microbiota of mice and to generate germ-free (GF) mice. The C57BL/6 mice were  
26 administrated with a cocktail of ampicillin (Sigma, 1 g/L), metronidazole (Fisher, 1 g/L),  
27 neomycin (Fisher, 1 g/L) and vancomycin (Fisher, 0.5 g/L) for 14 consecutive days in drinking  
28 water as previously described [24, 25]. Water containing the antibiotics was stored at 4°C  
29 before use and changed every 3 days. Mice exhibiting more than a 30% decline in body  
30 weight were excluded from the study.

31

### 32 **Fecal microbiota transplantation (FMT)**

33 In the humanized FMT mouse model, donor microbiota were prepared using pooled fecal  
34 samples from two MAs with severe depressive symptoms and two age- and gender-matched  
35 HCs (figure 1a). In the mouse-to-mouse FMT model, donors were obtained from two mice  
36 randomly selected from 10 mice per group. Briefly, 3 days prior to peroral FMT, the  
37 antibiotic cocktail was withdrawn and replaced by sterile drinking water. FMT was done as  
38 previously described [26]. Fresh fecal pellets from the corresponding donors were  
39 immediately weighed and then diluted with sterile PBS (1 g/mL for humanized FMT; 1 fecal

1 pellet/ml for mouse-mouse FMT). The stool was steeped in sterile PBS for about 15 min,  
2 shaken, and then centrifuged at 1000 rpm, 4 °C for 5 min. The suspension was centrifuged at  
3 8000 rpm, 4 °C for 5 min to get total bacteria, then filtered twice in PBS. For each GF recipient  
4 mouse, 200 µl of bacterial suspension (10<sup>8</sup> CFU/mL) was transplanted by gavage each day for  
5 7 consecutive days. The recipient mouse was maintained for 7 days for transplanted  
6 microbiota recolonisation before being subjected to experiments.

7

### 8 **METH and metformin treatment in mouse model**

9 METH was obtained from Narcotics Department of Yunnan Provincial Public Security  
10 Administration and was dissolved in 0.9% NaCl solution. Metformin (Sigma-Aldrich, USA)  
11 were dissolved in 0.9% NaCl solution. Mice were randomized to one of four treatment groups:  
12 Saline, METH, Metformin and METH/Metformin program. Mice were treated with Saline  
13 (0.2ml/mouse, i.p.), METH (5mg/kg, i.p.), Metformin (200mg/kg, i.p.) and METH/Metformin  
14 (i.p.) for 21 days on the corresponding treated group respectively. The METH dose was  
15 determined based on the data of behavioural sensitization and CPP test ([supplementary figure](#)  
16 [1](#)) while metformin dose was determined as previously used in preclinical [27] and animal  
17 study [28, 29]. Body weights were measured every week, fecal sample were collected on day  
18 24.

19

### 20 **Behavioural tests**

21 All behavioural analyzes were performed during the 09:00–17:00 light cycle. Animals were  
22 habituated in the test room for 2-h before starting the experiments. The open field and  
23 elevated plus apparatus were cleaned with 70% ethanol between each trial. To establishment  
24 of METH dependent mouse model, mice were treated with METH (5 mg/kg, i.p.) once a day  
25 for 21 consecutive days ([figure 2b](#)). Behavioural procedures locomotor sensitization and  
26 conditioned place preference (CPP) which were associated with rewarding effects of METH  
27 were used to confirm the establishment of addiction and dependent. The behavioural tests  
28 were conducted in this order: open field test (OFT), elevated plus maze (EPM), tail  
29 suspension test (TST) and forced swim test (FST). All behavioural analyzes were performed  
30 blinded to treatment groups.

31

### 32 **Behavioural locomotor sensitization**

33 METH-induced behavioural sensitization was measured in an open field test using the  
34 ENV-510 test environment and ANY-maze software (Stoelting Co.) as described in previous  
35 study [30]. Mice received an injection of normal saline (10 µl/kg) as control and 5 mg/kg  
36 METH as treated group for 13 consecutive days. On day 14, mice were injected with METH  
37 or saline immediately before confinement to the test room, locomotor activity was monitored  
38 for 60 min.

39

### 1 **Conditioned place preference (CPP)**

2 METH-induced CPP was evaluated using the CPP system and monitored by ANY-maze  
3 (Stoelting Co.). Briefly, the CPP schedule consisted of three phases: preconditioning,  
4 conditioning, and post-conditioning. In preconditioning phase, mice were initially placed in  
5 the middle chamber with the doors removed for 15 min as the baseline preference. During the  
6 conditioning phase, mice was treated for 14 days with alternate injections of either METH (5  
7 mg/kg, i.p.) or saline (2 ml/kg, i.p.). Mice were confined to the white compartment for 45 min  
8 immediately after METH administration and to the black compartment after saline injection.  
9 In the postconditioning phase, CPP testing was carried out on day 15 when each animal was  
10 again allowed to explore all chambers freely, the time spent in each of the two compartments  
11 was automatically recorded for 15 min. CPP scores were defined as post-conditioning time  
12 subtracted from preconditioning time.

13

### 14 **Open field test (OFT)**

15 To observe subsequent behaviours for evaluating anxiety and locomotor activity, each  
16 mouse was placed individually in the corner of an open-field arena (45 ×45 ×30 cm) and  
17 allowed to explore freely for 6 min. Its spontaneous activities were recorded using a video  
18 tracking system (ANY-maze, Stoelting Co.). The total movement distance was used as a  
19 measure of locomotor activity, while the time spent in the center (inner 25% of the surface  
20 area) was used as an index of anxiety-like behaviours [31].

21

### 22 **Elevated plus maze (EPM)**

23 EPM was used to determine the unconditioned response to a potentially dangerous  
24 environment. Anxiety-related behaviour was measured by the degree to which the rodent  
25 avoided the open arms of the maze. As previously described [32], on each of the assessment  
26 days, mice were transferred to the middle of the elevated plus maze apparatus, and allowed  
27 freely to explore within the four arms for 5 min. The time of activity at open arms (s) were  
28 recorded by the video tracking system (ANY-maze, Stoelting Co.) as indicative of  
29 anxiety-like behaviour.

30

### 31 **Forced swim test (FST)**

32 The FST evaluates the depressive-like behaviour in rodents. A day before the test, all mice  
33 were gently placed in cylinder (30 cm height, 17 cm diameter) filled with water to a depth of  
34 15 cm at 25°C and made to swim for a habituation period of 15 min. However, during  
35 experimentation, subjects were placed individually in filled glass cylinder for a period of 6  
36 min and the total duration of immobility was measured (ANY-maze, Stoelting Co.) as  
37 indicative of depressive-like behaviour. Immobility was defined as floating or remaining  
38 motionless without leaning against the wall of the cylinder [33].

39



## 1 **Tail suspension test (TST)**

2 In TST, mouse was suspended 50 cm above the surface of a table using adhesive tape  
3 placed 1 cm away from the tip of the tail, mice were considered immobile only when they  
4 hung passively and were completely motionless. We recorded duration of immobility in a  
5 6-minute period by a video tracking system (ANY-maze, Stoelting Co.) which was indicative  
6 of depressive-like behaviour [34].

## 8 **16S rRNA sequencing analysis**

9 Microbial genomic DNA was extracted from fecal samples following the manufacturer's  
10 protocol, using the MagPure Stool DNA KF Kit B (Magen, China). The quantity of genomic  
11 DNA was verified using the Qubit dsDNA BR Assay kit (Invitrogen, USA). The V4 regions  
12 of the 16S rRNA gene in the DNA extracted from fecal samples were amplified using the  
13 following degenerate PCR primers: 515 F (5'-GTG CCA GCM GCC GCG GTA A -3') and  
14 806R (5'-GGA CTA CHV GGG TWT CTA AT-3'). 16S rRNA sequencing analysis and its  
15 diversity was analyzed was performed using a combination of software mothur (version  
16 1.33.3), UPARSE (usearch version v8.1.1756, <http://drive5.com/uparse/>), and R (version  
17 3.6.3) as previously described [35]. The represent sequences of OTU were classified with Silva  
18 database (version 128) with confidence score  $\geq 0.6$  by the classify.seqs command in mothur.  
19 Rarefaction curves were generated based on OTU. The  $\alpha$ -diversity analysis was calculated  
20 using mothur. For the  $\beta$ -diversity analysis, nonparametric multi-dimensional scaling (NMDS)  
21 plots were depicted using the Vegan package. Discriminant analysis was performed using the  
22 linear discriminant analysis (LDA) effect size (LEfSe) pipeline. PICRUST2 was used to identify  
23 differences in the metabolic pathways between each group against the KEGG.

## 25 **Untargeted metabolomic relative quantitative analyzes**

26 The LC-MS analysis was performed as described previously [36]: 20 mg of fecal samples  
27 were accurately weighed and collected, mixed with adequate amounts of precooled  
28 acetonitrile/methanol (1:1, v/v), centrifuged for 20 min at 4 °C and 14,000g to collect the  
29 supernatant. Metabolic profiling of fecal samples was performed using an  
30 ultra-high-performance liquid chromatography (UHPLC, 1290 Infinity LC, Agilent  
31 Technologies, Santa Clara, CA, USA) coupled with a quadrupole time of-flight system (AB  
32 Sciex Triple TOF 6600, AB SCIEX) at Shanghai Applied Protein Technology Co., Ltd. The  
33 raw mass spectrometry data were converted to MzXML files using Proteo Wizard MSConvert  
34 before being imported into freely available XCMS software. Principal component analysis  
35 (PCA) and partial least square discriminant analysis (PLS-DA) were performed for both  
36 positive and negative models after log transformation and pareto scaling.

37

## 1 **Inosine complementation**

2 To test the effects specific metabolites inosine on behavioural phenotypes, mice were  
3 supplemented with 300mg/kg inosine (Sigma-Aldrich, USA) by intraperitoneal injection 4h  
4 after METH treatment. The dose was determined in mice based on previous described [37].  
5 Body weight was measured at baseline and post-treatment.

6

## 7 **Statistical analysis**

8 Statistical analysis was performed using Prism software (GraphPad). Data are represented  
9 as mean±SD or mean±SEM. The differences between two groups were assessed using a  
10 two-tailed, unpaired t-test. The differences among three or more groups were assessed using  
11 one-way or two-way ANOVA. Wilcoxon test and Kruskal-Wallis test were used to evaluate  
12 differences in the microbiota between two or multiple groups. Correlations between variables  
13 were calculated using Spearman's rank-correlation analysis with R version 3.5.3. Significant  
14 differences are indicated in the figures by \* $p < 0.05$ , \*\* $p < 0.01$ , \*\*\* $p < 0.001$ , \*\*\*\* $p < 0.0001$ .  
15 Notable nearly significant differences ( $0.05 < p < 0.1$ ) are indicated in the figures.

16

## 17 **RESULTS**

### 18 **The gut microbiota profile is altered in METH addicts**

19 To characterise the gut microbiota from MAs, we enrolled a total of 32 study participants  
20 with an average age of  $37.75 \pm 11.12$  years, including 15 male MAs currently undergoing  
21 withdrawal and 17 age- and gender-matched HCs. There were no statistically significant  
22 differences in demographic or anthropometric parameters between the two groups of study  
23 participants. Compared to the HCs, the levels of anxiety ( $46.87 \pm 6.94$  vs.  $40.58 \pm 4.39$ ,  $p =$   
24  $0.0042$ ) and depression ( $51.1 \pm 10.36$  vs.  $38.47 \pm 8.73$ ,  $p = 0.0008$ ) were significantly higher in  
25 the MAs (table 1).

|                               | <b>HCs</b>        | <b>MAs</b>        | <b>p</b>      |
|-------------------------------|-------------------|-------------------|---------------|
| <b>Subjects</b>               | n=17              | n=15              | NA            |
| <b>Age (years)</b>            | $38.24 \pm 12.13$ | $37.20 \pm 9.99$  | 0.7974        |
| <b>Gender</b>                 | Male              | Male              | NA            |
| <b>BMI (kg/m<sup>2</sup>)</b> | $22.8 \pm 2.97$   | $22.9 \pm 3.37$   | 0.591         |
| <b>METH use time (y)</b>      | NA                | 3                 |               |
| <b>Relapse times (n)</b>      |                   |                   |               |
| <b>1st time</b>               | NA                | 5                 |               |
| <b>2nd time</b>               | NA                | 9                 |               |
| <b>More than twice</b>        | NA                | 1                 |               |
| <b>SAS</b>                    | $40.58 \pm 4.39$  | $46.87 \pm 6.94$  | <b>0.0042</b> |
| <b>SDS</b>                    | $38.47 \pm 8.73$  | $51.13 \pm 10.36$ | <b>0.0008</b> |

26 **Table 1 Demographic and clinical characteristics of the study participants.** There were no  
27 statistical difference of age and BMI in two groups. MAs were in anxiety and depression during

1 withdrawal according to the scores of SAS and SDS. Data are expressed as mean  $\pm$  SEM;  
2 significance testing is by paired t-test.

3

4 In the present gut microbiota investigation, we surveyed bacterial composition by 16S  
5 rRNA gene deep sequencing and generated over 1,476,500 (~ 450 bp) raw sequencing data.  
6 After demultiplexing and quality filtering, we obtained a total of 1,325,000 high-quality reads  
7 (mean, 40,000 reads/sample) and first evaluated the ecological features of the bacterial  
8 communities between the two groups using a variety of indices. Based on the rarefaction  
9 analysis estimates, the species richness in MAs was much higher than that of HCs (figure 1a).  
10 Richness estimates such as ace and chao1 indices also indicated that the bacterial  $\alpha$  diversity  
11 was significantly higher in the MAs than that in the HCs (figure 1b-c). Simultaneously, the  
12 nonmetric multidimensional scaling (NMDS) analysis for  $\beta$  diversity revealed a distinct  
13 structural difference between the two groups (figure 1d). Taken together, the diversity  
14 analyses indicated that the gut microbiota from MAs with relatively higher  $\alpha$  diversity and  
15 distinct microbial structures was significantly different than those from HCs. Beyond the  
16 general composition of the microbiota, specific taxa were also observed to be differentially  
17 expressed between MAs vs HCs. Linear discriminant analysis (LDA) identified five  
18 statistically significant differences between the two groups at the family level (LDA > 4.0,  
19  $p < 0.05$ ). The relative proportions of *Ruminococcaceae*, *Rikenellaceae*, and  
20 *Enterobacteriaceae* were significantly higher in MAs compared with HCs. We also found  
21 significantly lower levels of *Bacteroidaceae* and *Alcaligenaceae* in MAs than in HCs (figure  
22 1e-f), suggesting that these differential bacteria could be considered as potential biomarkers.  
23 In addition, the functional diversity of the putative metagenomes was assessed using the  
24 PICRUSt, allowing the prediction of signalling pathways from the 16S rRNA data. As shown  
25 in figure 1g, there were significant differences in the mean proportions between the two  
26 groups, and some pathways displayed a difference of at least 0.1%. Specifically, the pathways  
27 including immune system ( $p = 3.85e-05$ ), endocrine and metabolic disease ( $p = 7.77e-04$ ), and  
28 bacterial infection ( $p = 8.90e-04$ ) were significantly enriched in MAs, suggesting that the gut  
29 microbial alterations in MAs may be involved in endocrine/metabolic and infectious diseases.

30 Furthermore, we evaluated correlations between the relative abundances of bacterial  
31 families and the severity of withdrawal symptoms using the Spearman correlation method.  
32 With significant inter-individual variability, we identified that the relative abundance of  
33 *Rikenellaceae* was positively correlated with both SAS ( $p < 0.001$ ,  $r = 0.98$ ) and SDS ( $p < 0.001$ ,  
34  $r = 0.96$ ) scores (figure 1h-j). These data suggest that the higher level of relative abundance of  
35 *Rikenellaceae* might predict more severe anxious and depressive symptoms in MAs.

36

37 **Gut microbiota from MAs with anxiety and depression is sufficient to promote**  
38 **behavioural deficits in mice**

1 Evidence exists that the gut dysbiosis is associated with METH withdrawal induced  
2 depressive behaviours in rats [38]. We sought to determine whether the transplantation of  
3 human gut microbiota was sufficient to transfer the hallmarks of the withdrawal syndrome  
4 state from MAs to GF mice. Herein, we utilized a practical and clinically relevant GF mouse  
5 model by treating mice with an antibiotic cocktail (**MATERIALS AND METHODS**), after  
6 which the depletion of gut microbiota was confirmed ([online supplementary figure 2](#)). Two  
7 representative MA donors were chosen based on their SAS/SDS scores and history of  
8 substance use and relapse. Consistent with previous analysis, the fecal samples from MAs  
9 exhibited significant alterations in both  $\alpha$  and  $\beta$  diversities within bacterial communities  
10 compared to the HCs donors (data not shown). After that, the fecal samples from MAs and  
11 HCs donors were transplanted into GF mice to generate “humanized microbiota” mice,  
12 denoted as FMT-MAs and FMT-HCs, respectively.

13 METH-dependent mice were also generated ([online supplemental figure 1a](#)). Consistent  
14 with the psychiatry symptoms frequently observed in MAs, these mice exhibit severe  
15 behavioural deficits during the acute withdrawal stage ([online supplemental figure 1b-c &](#)  
16 [figure 2a](#)). Similarly, these FMT-MAs mice exhibited significantly decreased central time in  
17 the open field test (OFT) and the open arm time in the elevated plus maze (EPM) test when  
18 compared to the FMT-HCs mice ([figure 2d-e](#)). In addition, these FMT-MAs mice showed  
19 increased immobility time in the tail suspension test (TST) and forced swim test (FST) tests  
20 compared to the FMT-HCs mice ([figure 2f, g](#)). Overall, these results indicated that the  
21 FMT-MAs mice displayed obvious anxiety and depression-like behaviours, suggesting that  
22 the FMT transfer from human MA donors into GF mice could also transfer withdrawal  
23 syndrome-relevant behavioural deficits.

24

## 25 **Administration of metformin ameliorates METH-induced anxiety and depression-like** 26 **behaviours in mice**

27 Metformin has been reported to ameliorate METH-induced depression-like  
28 neurobehaviours in rats [17]. To investigate the underlying molecular mechanism regarding  
29 metformin’s action on behavioural deficits associated with METH withdrawal, mice were  
30 grouped and treated with saline, METH, metformin, and METH/metformin ([figure 3a](#)). In  
31 accord with previous results, mice spent much less time in the central square of the OFT and  
32 spent longer time in open arms but less time in closed arms in the EPM after a 21-day METH  
33 exposure and then an abrupt cessation, indicating that these mice in the METH group  
34 displayed a relatively more severe anxious-like behaviour compared to the mice in the saline  
35 and metformin groups. There were no obvious behavioural changes in the metformin group  
36 mice in either OFT nor in EPM tests ([figure 3b-d](#)). It is worth noting that although metformin  
37 did not ameliorate METH-induced hyperactivity in OFT ([figure 3c](#)), it could largely reverse  
38 METH withdrawal-induced anxiety in mice. For example, mice treated with  
39 METH/metformin spent a significantly prolonged time in the central region of the OFT but

1 decreased time in the closed arms of the EPM as compared to the mice treated with METH  
2 only. We further performed FST and TST to assess depression-related behaviours in mice.  
3 METH significantly prolonged the immobility time of mice in the TST and shortened the  
4 swim time but prolonged immobility time in the FST when compared to the mice in saline or  
5 metformin groups. Notably, the immobility could be abolished by adding metformin  
6 treatment, and results were statistically significant in comparison to mice receiving METH  
7 administration only (figure 3e-f). All these results provide additional evidence that metformin  
8 ameliorates METH withdrawal-induced anxiety and depression-like behavioural disturbances.

9 To further determine whether the metformin could modulate METH-altered gut microbiota  
10 and therefore participate in the development of withdrawal symptoms, we investigated their  
11 fecal microbiota profiles from the four above mouse groups and analyzed the alterations of  
12 microbial composition at the class, family, and genera levels (figure 3g-i). At the class level,  
13 the relative abundances of *Actinobacteria* and *Detaproteobacteria* in the METH group was  
14 higher than in the saline group, whereas the relative abundances were lower in  
15 METH/Metformin-treated mice compared to the METH group. Meanwhile, the relative  
16 abundance of *Beltaproteobacteria* in the METH group mice was higher than that in the saline  
17 group mice, whereas they were less abundant in the METH/Metformin group mice compared  
18 to the METH group. At the family level, the relative abundance of *Bifidobacteriaceae*,  
19 *Desulfovibrionaceae*, and *Rikenellaceae* were significantly increased in METH group mice  
20 compared to the saline group mice. The METH/Metformin-treated mice had a higher relative  
21 abundance of *Bifidobacteriaceae*, whereas the relative abundance of *Desulfovibrionaceae* and  
22 *Rikenellaceae* were significantly decreased (figure 3h, k). At the genus level, the relative  
23 abundance of *Coprococcus*, *Bifidobacterium*, and *Ruminococcus* in the METH-treated mice  
24 was increased compared with control mice, whereas metformin decreased the relative  
25 abundances of *Coprococcus* and *Ruminococcus* but the decrease was not significant (figure 3i,  
26 l). Overall, METH exposure significantly altered the bacterial composition and structure, as  
27 well as relative abundance of a number of bacterial groups, whereas the added metformin  
28 treatment partially reversed these alterations.

29

### 30 **Administration of metformin restores METH induced microbial disturbances that** 31 **correlate with behaviours**

32 To determine whether the metformin-altered microbiota contribute to the modulation of  
33 METH withdrawal syndrome-relevant behavioural deficits, we further conducted  
34 mouse-to-mouse FMT by transferring fecal samples from three groups of treated mice  
35 (METH, saline, and METH/metformin) in the GF mouse model (figure 4a). After 1 week of  
36 colonisation, the “METH microbiota” recipient GF mice displayed a decreased centre time in  
37 the OFT and spent less time in the open arm in the EPM compared to “saline microbiota”  
38 recipient GF mice, which is indicative of anxiety-like behaviours in METH microbiota  
39 recipient mice (figure 4b-d). In the TST and FST, the immobility time in METH microbiota

1 recipients was significantly longer than that of controls in saline group, indicating a stronger  
2 depression-like phenotype in these mice (figure 4e-f). However, the METH/metformin  
3 microbiota recipient mice continued to exhibit less severe depressive and anxiety behaviours  
4 compared to the METH microbiota recipient mice (figure 4b-f). These results indicated that  
5 the METH- induced anxiety and depression-like behaviours and the reversal effect of  
6 metformin on the withdrawal symptoms were transmissible via the gut microbiota.

7 To identify the bacteria that might be responsible for the effects exerted by FMT, the  
8 composition of the gut microbiota in caecal content after FMT was further analyzed. There  
9 were significant differences at family level, which were composed by *Verrucomicrobiaceae*,  
10 *Rikenellaceae*, *Erysipelotrichaceae*, *Helicobacteraceae*, *Prevotellaceae*, *Bacteroidaceae*,  
11 *Porphyromonadaceae*, *Peptostreptococcaceae*, and *Lachnospiraceae*. Of these,  
12 *Verrucomicrobiaceae* and *Rikenellaceae* were significantly different at the family level  
13 between three groups as determined by LEfSe (online supplementary figure 4). Taken  
14 together, our findings support the notion that altered gut microbiota mediate metformin's  
15 anti-anxiety and anti-depression effects.

16

#### 17 **Untargeted metabolomics revealed an association between action of metformin and** 18 **microbiota-derived metabolites**

19 Metabolites of commensal bacterial play a key role in microbe–host interactions [39, 40].  
20 Metabolomic analyzes of fecal samples were also performed in FMT mouse models to  
21 determine the bacterial metabolite changes in response to METH withdrawal and metformin  
22 treatment using liquid chromatography-mass spectrometry. A total of 357 volatile organic  
23 compounds were identified in our untargeted metabolomics analysis from 54 fecal samples in  
24 all six groups. Subject-specific compounds and metabolites present in less than 20% of  
25 subjects in both groups were discarded from statistical analysis. To identify differences in  
26 metabolic profiles among saline, METH, and METH/Metformin-treated groups, as well as in  
27 the FMT group, PLS-DA score plots were performed for both donor and recipient modes. The  
28 PLS-DA score plot from the fecal samples ( $R^2X=0.0.188$ ,  $R^2Y=0.793$ ,  $Q^2=0.337$  in the  
29 donor groups and  $R^2=0.0.487$ ,  $R^2Y=0.876$ ,  $Q^2=0.7$  in the recipient groups) illustrates  
30 excellent metabolic distinctions among saline, METH, and METH/metformin groups and in  
31 the recipient groups (figure 5a). In total, 13 metabolites showed significant group differences  
32 (figure 5b), of which inosine, deoxyinosine, folinic acid, ketoisocaproic acid and allantoin  
33 were significantly decreased or almost totally absent in faeces from METH-treated mice but  
34 were nearly completely restored after metformin treatment (figure 5c-h).

35

#### 36 **Inosine complementation normalizes METH induced anxiety and depression-like** 37 **behaviours in mice**

38 Inosine is a common component of food and has been shown to have a potential  
39 neuroprotective function [41]. To test the hypothesis whether inosine complementation could

1 be beneficial for substance withdrawal syndrome, METH-treated mice were given inosine  
2 (300 mg/kg, i.p.) for 3 weeks and then underwent behavioural testing ([figure 6a](#)). Inosine  
3 complementation significantly increased the time mice spent in the centre in the open field  
4 test and the duration in the open arms of the elevated plus maze as compared to the METH  
5 group mice ([figure 6b-d](#)). In addition, mice treated with METH/inosine treatment had  
6 significantly reduced immobility time in the tail suspension test and the forced swim test  
7 compared to the mice in the control group ([figure 6e, f](#)). Combined, these data suggest that  
8 inosine complementation could restore, at least partially, METH withdrawal-induced anxiety  
9 and depression-like behaviours.  
10

## 1 DISCUSSION

2 In the present study, using state-of-the-art integrative multi-omics technologies and FMT  
3 models, we provided evidence showing that 1) METH withdrawal-induced anxiety and  
4 depression-like behaviours are convertible and transmissible via gut microbiota in a mouse  
5 model and 2) the therapeutic effects of metformin on psychiatric manifestations are associated  
6 with microbiota derived metabolites. Our results highlight the role of gut microbiota as an  
7 important mediating factor in substance withdrawal symptoms through the  
8 microbiota-gut-brain axis and its impact on host metabolism.

9 Cumulative evidence has shown that the differential pattern of gut microbiota could  
10 identify patients with various psychiatric or neurodevelopmental diseases and mediate  
11 relevant behavioural deficits [42, 43, 44]. Emerging studies reported that the exposure and the  
12 cessation of METH or other substance induced behavioural disturbances as well as alterations  
13 in gut microbiota [38, 45, 46]. Although these compelling association studies in humans  
14 suggest gut microbiota may impact psychiatric symptoms, a direct contribution by the  
15 microbiota to the pathophysiology and behavioural outcomes during METH withdrawal stage  
16 has not been well described. By analyzing human MAs and METH dependent mice, we  
17 showed that both MAs and the mouse model exhibited serious withdrawal symptoms  
18 especially anxiety-and depression-related behavioural deficits (table 1, figure 2). Meanwhile,  
19 the gut microbiota from human MAs exhibited higher community diversity and distinct  
20 microbial structures comparing to those of HCs, which is opposite to the findings in many  
21 other neuropsychiatric diseases, such as Alzheimer's disease [47], schizophrenia [48],  
22 schizophrenia [49], and autism spectrum disorders [50]. The result was somewhat unexpected.  
23 We suspect that the mechanism of METH-induced psychiatric symptoms might be different  
24 than in other mental and neurological diseases, and this might be related to symptoms such as  
25 hyperactivity and excitement in MAs. Notably, the abundance of the core microflora  
26 *Rikenellaceae* was positively correlated with the severity of anxiety and depression in MAs.  
27 Although a strong presence of *Rikenellaceae* has been reported in Alzheimer's disease [47]  
28 and schizophrenia [48], according to our knowledge, this is the first study reporting the  
29 association of the relative abundance of *Rikenellaceae* and the severity of METH-induced  
30 withdrawal symptoms.

31 In addition to the association analysis, the most exciting part of our study is that we  
32 performed two types of FMTs to investigate the role of microbiota in development of  
33 behavioural deficits (figure 2,3). In the human-to-mouse FMTs, we observed that the  
34 withdrawal symptoms including anxiety and depression could be transferred from MAs to the  
35 GF mouse model. Subsequently, in the mouse-to-mouse FMTs, by comparing the recipients  
36 GF mice from METH-treated mouse donors vs. saline-treated mouse donors, we found that  
37 the FMT-METH mouse recipients exhibited apparent anxiety and depression-like behavioural



1 deficits, confirming the critical role of gut microbiota in the pathophysiology of the substance  
2 withdrawal syndrome.

3 Furthermore, it is well known that metformin is mostly used in diabetes treatment. The  
4 beneficial effect of metformin on substance withdrawal-related symptoms has been recently  
5 reported, but the mechanistic study was mostly focused on the CNS [17]. Although an  
6 alteration of both gut microbiota and its metabolomics in response to metformin treatment  
7 may be the key for the interpretation of physiological outcomes, to date, no study has focused  
8 on the role of metformin on microbiota in MAs, and the molecular mechanisms of metformin  
9 in diseases other than diabetes are not fully deciphered. Toward this end, we carried out two  
10 series of mouse experiments to validate the function and to explore the possible mechanism.  
11 In one study, we administrated metformin in the METH-dependent mouse model and  
12 validated the therapeutic effects of metformin on METH-induced behavioural phenotypes. In  
13 another study, we conducted mouse-to-mouse FMTs and consequently compared the  
14 behavioural outcomes of recipient GF mice with METH-, saline- or METH/metformin-treated  
15 mouse donors. Our analysis clearly demonstrated that the addition of metformin ameliorates  
16 METH withdrawal-related anxiety- and depression-like behavioural disturbances in mice,  
17 which is consistent with previous study in rat. Intrigued by the abovementioned data, however,  
18 we conclude that the gut microbiota could act as an alternative route for metformin  
19 functioning with respect to psychiatric symptoms (figure 3,4).

20 Extending the analysis to the gut microbiota composition and function alterations in  
21 response to METH exposure and metformin treatment, we characterized the bacterial  
22 taxonomic composition of mouse fecal samples from before and after FMTs relative to their  
23 controls (figure 5a, c). Comprehensive investigation of bacterial families suggests that higher  
24 level of *Rikenellaceae* which were positively associated with anxiety and depression were  
25 observed both in humans and mice (figure 7a, c). Post FMT, the *Rikenellaceae* in the GF  
26 mouse model were similar to those in donor samples (figure 7b, d) indicating successful  
27 colonisation using the FMT protocol. Strikingly, metformin was able to decrease the level of  
28 *Rikenellaceae* and ameliorates METH induced anxiety and depression-like behaviours in the  
29 recipient GF mice (figure 7b, d), suggesting that relative abundance of *Rikenellaceae* in gut  
30 microbiota could be used as a diagnostic biomarker for METH withdrawal syndrome.

31 Simultaneously, we hypothesized that metabolites produced by gut bacteria might be an  
32 additional factor mediating psychiatric symptoms. The metabolic profiles calculated by  
33 PLS-DA were clearly distinct among saline, METH, METH/metformin mouse groups and in  
34 their corresponding FMT recipient mouse groups (figure 5a-b). Among identified differential  
35 metabolites, we discovered that as a key bacterial-derived metabolite inosine was reduced in  
36 fecal by METH exposure and could be restored by metformin treatment (figure 6a, c). Inosine,  
37 a major breakdown product of adenosine, has recently been shown to exert  
38 immunomodulatory [37, 51] and neuroprotective effects [41, 52] via the  
39 microbiota–inosine–A2A receptor axis or ERK and CREB pathway. In addition, inosine can

1 permeate the blood–brain barrier and it is likely that decreased levels may reflect a reduction  
2 of these metabolites in the CNS. Oral administration of inosine has the potential to prevent  
3 depressive disorder [41]. Because of the low abundance in fecal samples of humans and mice,  
4 the intestinal microflora such as *B.pseudolongum* [37] and *L.reuteri* [51] that may generate  
5 amounts of purine/inosine have not yet been identified. There is no direct evidence that  
6 *Rikenellaceae* could regulate inosine production. Based on the evidence in the literature, we  
7 postulate that: 1) *Rikenellaceae* may promote inosine absorption by modulating the overall  
8 gut microbial community and structure; 2) metformin increases intestinal levels of short-chain  
9 fatty acids and activation of AMP-activated protein kinase and strengthens the intestinal  
10 barrier integrity to reduce inosine leakage, therefore resulting in the modulation of the  
11 *Rikenellaceae* level.

12 However, there are still some limitations in our study. One is the sample size of human  
13 MAs, and we need to obtain detailed information on the structure and function of the gut  
14 microbiota with a larger cohort study design. Second, 16S rRNA gene sequencing achieves  
15 only approximately 80% accuracy at the family level and is not able to fully resolve  
16 taxonomic profiles at the species or strain level [53, 54]. Therefore, shotgun sequencing will  
17 be warranted for the comprehensive profiling of the DNA from gut microbiota and to evaluate  
18 the effects and to unveil the subtle changes occurring with substance use and  
19 pharmacotherapy both in preclinical animal models and in randomised clinical trials.

20 In summary, our data provide support for the notion that the gut microbiota mediate some  
21 of the METH withdrawal-induced psychiatric symptoms, and metformin ameliorates  
22 behavioural deficits through an alternative route. Our metagenomic and metabolomic analyses  
23 reveal that the family *Rikenellaceae* and the metabolite inosine are the major mediators and  
24 contributors to the functional changes associated with METH use and metformin treatment.  
25 Overall, these results highlight the role of the gut microbiota in substance use disorders and  
26 the pathophysiology of withdrawal symptoms.

27

## 28 **Data availability**

29 16S rRNA gene sequencing data for all samples have been submitted to the National  
30 Genomics Data Center (NGDC), under accession identification PRJCA001536  
31 (<http://bigd.big.ac.cn/gsa>).

## 32 **Conflict of Interest:**

33 All authors declare no competing interest.

## 34 **Acknowledgements**

35 This study was supported by the National Natural Science Foundation of China  
36 (No.3171101074, No.81870458, No. 31860306); Science and Technology Department of

1 Yunnan Province (Grant No. 2018NS0086, 2019FE001, 202001AS070004,  
2 202001AV070010); The Major project of Yunnan Provincial Bureau of Education (2020J0161;  
3 2021J0234).

4

## 5 **Author contributions**

6 Designed the experiments: JY and KW. Recruited clinical participants and collected samples:  
7 JY, ZZ, LB, PX, FC, HW, YZ, MZ. Animal behaviors and mice experiment: JY, YZ, MC, JG,  
8 FC. Performed the fecal microbiota transplantation: YZ, XY, MC, HL. Analyzed the 16S  
9 rRNA and metabolomics data: JY, KW, ZX, YK, QP, YD. Drafted the manuscript: JY, ZZ. All  
10 authors contributed to revision of the paper.

11

## 1    **References**

- 2    1    Leshner, I. A. Addiction Is a Brain Disease, and It Matters. *Science* 1997;**278**:45-7.
- 3    2    Darke S, Kaye S, McKetin R, Duffou J. Major physical and psychological harms of  
4    methamphetamine use. *Drug Alcohol Rev* 2008;**27**:253-62.
- 5    3    Glasner-Edwards S, Mooney LJ, Marinelli-Casey P, Hillhouse M, Ang A, Rawson R, *et al.* Anxiety  
6    disorders among methamphetamine dependent adults: association with post-treatment functioning.  
7    *The American journal on addictions* 2010;**19**:385-90.
- 8    4    McGregor C, Srisurapanont M, Jittiwutikarn J, Laobhripatr S, Wongtan T, White JM. The nature,  
9    time course and severity of methamphetamine withdrawal. *Addiction* 2005;**100**:1320-9.
- 10    5    Zorick T, Nestor L, Miotto K, Sugar C, Hellemann G, Scanlon G, *et al.* Withdrawal symptoms in  
11    abstinent methamphetamine-dependent subjects. *Addiction* 2010;**105**:1809-18.
- 12    6    Hall WFAUHJ, Hando JFAUDS, Darke SFAURJ, Ross J. Psychological morbidity and route of  
13    administration among amphetamine users in Sydney, Australia. *Addiction* 1996;**91**:81-7.
- 14    7    McKetin RFAURJ, Ross JFAUKE, Kelly EFAUBA, Baker AFAULN, Lee NFAULDI, Lubman DIFAUMR, *et*  
15    *al.* Characteristics and harms associated with injecting versus smoking methamphetamine among  
16    methamphetamine treatment entrants. *Drug Alcohol Rev* 2008;**27**:277-85.
- 17    8    Jameson KG, Hsiao EY. Linking the Gut Microbiota to a Brain Neurotransmitter. *Trends Neurosci*  
18    2018;**41**:413-4.
- 19    9    Sun M-F, Zhu Y-L, Zhou Z-L, Jia X-B, Xu Y-D, Yang Q, *et al.* Neuroprotective effects of fecal  
20    microbiota transplantation on MPTP-induced Parkinson's disease mice: Gut microbiota, glial reaction  
21    and TLR4/TNF- $\alpha$  signaling pathway. *Brain, behavior, and immunity* 2018;**70**:48-60.
- 22    10    Jin M, Li J, Liu F, Lyu N, Wang K, Wang L, *et al.* Analysis of the Gut Microflora in Patients With  
23    Parkinson's Disease. *Front Neurosci* 2019;**13**:1184.
- 24    11    Kochalska K, Oakden W, S?owik T, Chudzik A, Pankowska A, azorczyk A, *et al.* Dietary  
25    supplementation with *Lactobacillus rhamnosus* JB-1 restores brain neurochemical balance and mi  
26    tigates the progression of mood disorder in a rat model of chronic unpredictable mild stress. *Nutr Res*  
27    2020;**82**:44-57.
- 28    12    Kelly JR, Allen AP, Temko A, Hutch W, Kennedy PJ, Farid N, *et al.* Lost in translation? The potential  
29    psychobiotic *Lactobacillus rhamnosus* (JB-1) fails to modulate stress or cognitive performance in  
30    healthy male subjects. *Brain, behavior, and immunity* 2017;**61**:50-9.
- 31    13    Zheng P, Zeng B, Zhou C, Liu M, Fang Z, Xu X, *et al.* Gut microbiome remodeling induces  
32    depressive-like behaviors through a pathway mediated by the host's metabolism. *Molecular psychiatry*  
33    2016;**21**:786-96.
- 34    14    Szczesniak O, Hestad KA, Hanssen JF, Rudi K. Isovaleric acid in stool correlates with human  
35    depression. *Nutr Neurosci* 2016;**19**:279-83.
- 36    15    Mardinoglu A, Boren J, Smith U. Confounding Effects of Metformin on the Human Gut  
37    Microbiome in Type 2 Diabetes. *Cell metabolism* 2016;**23**:10-2.
- 38    16    Foretz M, Guigas B, Bertrand L, Pollak M, Viollet B. Metformin: from mechanisms of action to  
39    therapies. *Cell Metab* 2014;**20**:953-66.
- 40    17    Keshavarzi S, Kermanshahi S, Karami L, Motaghinejad M, Motevalian M, Sadr S. Protective role of  
41    metformin against methamphetamine induced anxiety, depression, cognition impairment and  
42    neurodegeneration in rat: The role of CREB/BDNF and Akt/GSK3 signaling pathways. *Neurotoxicology*  
43    2019;**72**:74-84.

- 1 18 Coll AP, Chen M, Taskar P, Rimmington D, Patel S, Tadross JA, *et al.* GDF15 mediates the effects of  
2 metformin on body weight and energy balance. *Nature* 2020;**578**:444-8.
- 3 19 AlHussain F, AlRuthia Y, Al-Mandeeel H, Bellahwal A, Alharbi F, Almogbel Y, *et al.* Metformin  
4 Improves the Depression Symptoms of Women with Polycystic Ovary Syndrome in a Lifestyle  
5 Modification Program. *Patient preference and adherence* 2020;**14**:737-46.
- 6 20 Correll CU, Sikich L, Reeves G, Johnson J, Keeton C, Spanos M, *et al.* Metformin add-on vs.  
7 antipsychotic switch vs. continued antipsychotic treatment plus healthy lifestyle education in  
8 overweight or obese youth with severe mental illness: results from the IMPACT trial. *World Psychiatry*  
9 2020;**19**:69-80.
- 10 21 Wu H, Esteve E, Tremaroli V, Khan MT, Caesar R, Manneras-Holm L, *et al.* Metformin alters the  
11 gut microbiome of individuals with treatment-naive type 2 diabetes, contributing to the therapeutic  
12 effects of the drug. *Nature medicine* 2017;**23**:850-8.
- 13 22 Chen SB, Hu H, Gao YS, He HY, Jin DX, Zhang CQ. Prevalence of clinical anxiety, clinical depression  
14 and associated risk factors in chinese young and middle-aged patients with osteonecrosis of the  
15 femoral head. *PLoS One* 2015;**10**:e0120234.
- 16 23 Wu X, Liu Q, Li Q, Tian Z, Tan H. Health-Related Quality of Life and Its Determinants among  
17 Criminal Police Officers. *Int J Environ Res Public Health* 2019;**16**:1398-.
- 18 24 Bárcena C, Valdés-Mas R, Mayoral P, Garabaya C, Durand S, Rodríguez F, *et al.* Healthspan and  
19 lifespan extension by fecal microbiota transplantation into progeroid mice. *Nature medicine*  
20 2019;**25**:1234-42.
- 21 25 Arrieta MC, Walter J, Finlay BB. Human Microbiota-Associated Mice: A Model with Challenges.  
22 *Cell Host Microbe* 2016;**19**:575-8.
- 23 26 Kelly JR, Borre Y, Brien CO, Patterson E, Dinan TG. Transferring the blues: Depression-associated  
24 gut microbiota induces neurobehavioural changes in the rat. *Journal of Psychiatric Research*  
25 2016;**82**:109-18.
- 26 27 Wang J, Gallagher D, DeVito LM, Cancino GI, Tsui D, He L, *et al.* Metformin Activates an  
27 Atypical PKC-CBP Pathway to Promote Neurogenesis and Enhance Spatial Memory Formation.  
28 *Cell Stem Cell* 2012;**11**:23-35.
- 29 28 Brynildsen JK, Lee BG, Perron JJ. Activation of AMPK by metformin improves withdrawal signs  
30 precipitated by nicotine withdrawal. *Proceedings of the National Academy of Sciences of the United*  
31 *States of America* 2018;**115**:4282-7.
- 32 29 Gantois I, Khoutorsky A, Popic J, Aguilar-Valles A, Freemantle E, Cao R, *et al.* Metformin  
33 ameliorates core deficits in a mouse model of fragile X syndrome. *Nature medicine* 2017;**23**:674-7.
- 34 30 Su LY, Luo R, Liu Q, Su JR, Yang LX, Ding YQ, *et al.* Atg5- and Atg7-dependent autophagy in  
35 dopaminergic neurons regulates cellular and behavioral responses to morphine. *Autophagy*  
36 2017;**13**:1496-511.
- 37 31 Magnani P, Conforti A, Zanolin E, Marzotto M, Bellavite P. Dose-effect study of Gelsemium  
38 sempervirens in high dilutions on anxiety-related responses in mice. *Psychopharmacology*  
39 2010;**210**:533-45.
- 40 32 McClernon FJ, Kozink RV, Rose JE. Individual differences in nicotine dependence, withdrawal  
41 symptoms, and sex predict transient fMRI-BOLD responses to smoking cues.  
42 *Neuropsychopharmacology* : official publication of the American College of  
43 *Neuropsychopharmacology* 2008;**33**:2148-57.

- 1 33 Choi GE, Lee HJ, Chae CW, Cho JH, Jung YH, Kim JS, *et al.* BNIP3L/NIX-mediated mitophagy  
2 protects against glucocorticoid-induced synapse defects. *Nature communications* 2021;**12**:487.
- 3 34 Jung EM, Moffat JJ, Liu J, Draavid SM, Gurumurthy CB, Kim WY. Arid1b haploinsufficiency disrupts  
4 cortical interneuron development and mouse behavior. *Nat Neurosci* 2017;**20**:1694-707.
- 5 35 Wada N, Yuasa H, Kajitani R, Gotoh Y, Ogura Y, Yoshimura D, *et al.* A ubiquitous subcuticular  
6 bacterial symbiont of a coral predator, the crown-of-thorns starfish, in the Indo-Pacific. *Microbiome*  
7 2020;**8**:123.
- 8 36 Chen P, Wang C, Ren YN, Ye ZJ, Jiang C, Wu ZB. Alterations in the gut microbiota and metabolite  
9 profiles in the context of neuropathic pain. *Mol Brain* 2021;**14**:50.
- 10 37 Mager LF, Burkhard R, Pett N, Cooke NCA, Brown K, Ramay H, *et al.* Microbiome-derived inosine  
11 modulates response to checkpoint inhibitor immunotherapy. *Science* 2020;**369**:1481-9.
- 12 38 Forouzan S, Hoffman KL, Kosten TA. Methamphetamine exposure and its cessation alter gut  
13 microbiota and induce depressive-like behavioral effects on rats. *Psychopharmacology*  
14 2021;**238**:281-92.
- 15 39 Das NK, Schwartz AJ, Barthel G, Inohara N, Liu Q, Sankar A, *et al.* Microbial Metabolite Signaling  
16 Is Required for Systemic Iron Homeostasis. *Cell metabolism* 2020;**31**:115-30 e6.
- 17 40 Angoa-Pérez M, Kuhn DM, France C. Evidence for Modulation of Substance Use Disorders by the  
18 Gut Microbiome: Hidden in Plain Sight. *Pharmacological Reviews* 2021;**73**:571-96.
- 19 41 Muto J, Lee H, Lee H, Uwaya A, Park J, Nakajima S, *et al.* Oral administration of inosine produces  
20 antidepressant-like effects in mice. *Scientific reports* 2014;**4**:4199.
- 21 42 Zhu F, Guo R, Wang W, Ju Y, Wang Q, Ma Q, *et al.* Transplantation of microbiota from drug-free  
22 patients with schizophrenia causes schizophrenia-like abnormal behaviors and dysregulated  
23 kynurenine metabolism in mice. *Molecular psychiatry* 2020;**25**:2905-18.
- 24 43 Sharon G, Cruz NJ, Kang DW, Gandal MJ, Wang B, Kim YM, *et al.* Human Gut Microbiota from  
25 Autism Spectrum Disorder Promote Behavioral Symptoms in Mice. *Cell* 2019;**177**:1600-18 e17.
- 26 44 Shi K, Zhang L, Yu J, Chen Z, Lai S, Zhao X, *et al.* A 12-genus bacterial signature identifies a group  
27 of severe autistic children with differential sensory behavior and brain structures. *Clin Transl Med*  
28 2021;**11**:e314.
- 29 45 Cook RR, Fulcher JA, Tobin NH, Li F, Lee DJ, Woodward C, *et al.* Alterations to the Gastrointestinal  
30 Microbiome Associated with Methamphetamine Use among Young Men who have Sex with Men.  
31 *Scientific reports* 2019;**9**:14840.
- 32 46 Xu Y, Xie Z, Wang H, Shen Z, Guo Y, Gao Y, *et al.* Bacterial Diversity of Intestinal Microbiota in  
33 Patients with Substance Use Disorders Revealed by 16S rRNA Gene Deep Sequencing. *Sci Rep*  
34 2017;**7**:3628.
- 35 47 Sun ZZ, Li XY, Wang S, Shen L, Ji HF. Bidirectional interactions between curcumin and gut  
36 microbiota in transgenic mice with Alzheimer's disease. *Appl Microbiol Biotechnol* 2020;**104**:3507-15.
- 37 48 Zheng P, Zeng B, Liu M, Chen J, Pan J, Han Y, *et al.* The gut microbiome from patients with  
38 schizophrenia modulates the glutamate-glutamine-GABA cycle and schizophrenia-relevant behaviors  
39 in mice. *Sci Adv* 2019;**5**:eaau8317.
- 40 49 Xu R, Wu B, Liang J, He F, Gu W, Li K, *et al.* Altered gut microbiota and mucosal immunity in  
41 patients with schizophrenia. *Brain, behavior, and immunity* 2020;**85**:120-7.
- 42 50 Strati F, Cavalieri D, Albanese D, De Felice C, Donati C, Hayek J, *et al.* New evidences on the  
43 altered gut microbiota in autism spectrum disorders. *Microbiome* 2017;**5**:24.

- 1 51 He B, Hoang TK, Wang T, Ferris M, Taylor CM, Tian X, *et al.* Resetting microbiota by *Lactobacillus*  
2 *reuteri* inhibits T reg deficiency-induced autoimmunity via adenosine A2A receptors. *J Exp Med*  
3 2017;**214**:107-23.
- 4 52 Yuan S, Jiang X, Zhou X, Zhang Y, Teng T, Xie P. Inosine alleviates depression-like behavior and  
5 increases the activity of the ERK-CREB signaling in adolescent male rats. *Neuroreport* 2018;**29**:1223-9.
- 6 53 Hillmann B, Al-Ghalith GA, Shields-Cutler RR, Zhu Q, Gohl DM, Beckman KB, *et al.* Evaluating the  
7 Information Content of Shallow Shotgun Metagenomics. *mSystems* 2018;**3**.
- 8 54 Fuks G, Elgart M, Amir A, Zeisel A, Turnbaugh PJ, Soen Y, *et al.* Combining 16S rRNA gene variable  
9 regions enables high-resolution microbial community profiling. *Microbiome* 2018;**6**:17.

10

11

## 12 **Figure legends**

13 **Figure 1 Microbial characteristics of MAs. Alterations in intestinal microbiota diversity,**  
14 **composition, and function in MAs.** (a) The observed species rarefaction curve of the two groups.  
15 Rarefaction curves were assembled showing the number of OTUs, relative to the number of total  
16 sequences indicated that the abundance of species in gut microbiota in MAs is higher than in HCs.  
17 (b-c)  $\alpha$  diversity index ace and chao of the two groups. A higher diversity index was observed in  
18 MAs compared to the HCs according to ace ( $p = 0.0013$ ) and chao ( $p = 0.00069$ ) by the Wilcoxon  
19 rank-sum test. (d) Nonmetric multidimensional scale method (NMDS) analysis showed that the  
20 gut microbiota composition can distinguish samples from MAs and HCs. (e) Cardiogram showing  
21 differentially abundant taxonomic clades with a linear discriminative analysis (LDA) score  $> 4.0$   
22 among MAs (red) and HCs (green),  $p < 0.05$ . (f) Linear discriminative analysis (LDA) effect size  
23 (LEfSe) analysis between the HCs (red) and MAs (green), (g) Differences in the notability  
24 function in the Kyoto Encyclopedia of Genes and Genomes (KEGG) module prediction using 16S  
25 data with PICRUST2. (h-j) Correlation between the relative abundance of the families  
26 *Rikenellaceae*, *Ruminococcaceae*, *Enterococcaceae*, *Bacteroidaceae*, *Alcaligenaceae* and SAS  
27 and SDS. Each dot represents an individual and correlation was calculated using Pearson's  
28 correlation.

29

30 **Figure 2 Colonization of GF mice with MA microbiota reproduce human behaviours.**

31 Transferring FMT from MAs with high Self-Rating Anxiety Scale (SAS) and Self-Rating  
32 Depression Scale (SDS) scores to microbiota-depleted mice induced anxiety and depression-like  
33 features in the recipient animals. (a) Metadata of four human donors used for mouse colonization.  
34 (b-c) Experimental design. (d-g) Behaviour test. Panel d shows METH withdrawal mice and  
35 transplantation of the fecal microbiota from MAs. GF mice spent less time in the centre area in the  
36 open field test than control mice. Panel e shows results of time spent in the open arm in the  
37 elevated plus maze. Panel f shows results of immobile time in tail suspension test (n=5 in METH

1 group and n=10 in FMT group). Panel G shows results of immobile time in the forced swim test.  
2 All data are expressed as mean  $\pm$  SD.

3

4 **Figure 3 Metformin improved METH withdrawal-induced anxiety and depression**

5 **behaviour and characteristics of gut microbiota in all groups.** (a) Experimental scheme. (b-c)  
6 Results of the open field test in all groups. (d) Results of the elevated plus maze in all groups. (e)  
7 Results of the tail suspension test in all groups. (f) Results of the forced swimming test in all  
8 groups. (g-i) Taxonomic distribution at the class (g), family (h) and genus (i) level in the four  
9 groups. Different colours indicate different flora, and the length of each colour column represents  
10 the abundance of corresponding flora. Abundance is presented in terms of the percentage of the  
11 total effective bacterial sequences in each group (n=10). (j-k) Statistically significant differences  
12 taxa are listed (p value of Wilcox test <0.05) at the class (j), family (k) and genus (l) level.

13

14 **Figure 4 Transfer of fecal samples from mice-to-mice showed that withdrawal symptoms**

15 **were improved in mice that received metformin-altered microbiota.** (a) Experimental  
16 scheme. (b-f) Mice receiving FMT from METH-treatment mice showed the same behaviour  
17 as donor mice; mice transplanted with metformin-treated fecal microbiota showed lower  
18 anxiety-like and depression-related behaviours. (b-c) Time in the centre zone and locomotor  
19 activities in open field test were analyzed. (d) Time spent in the open arm in the elevated plus  
20 maze test. (e) Time spent immobile in the forced swimming test. (f) Time spent immobile in  
21 the tail suspension test. All data are expressed as mean  $\pm$  SD (n=12/group).

22

23 **Figure 5 Fecal metabolomic profiles are modulated by metformin treatment.** (a) Scatter

24 plot of PLS-DA scores for fecal metabolites showing significant separation among saline,  
25 METH and METH/metformin groups as well as in the recipient mice. (b) Heat map showing  
26 the levels of 13 fecal metabolites that were significantly altered by metformin treatment in  
27 METH-dependent mice. Colours indicate fold changes with  $p < 0.05$ . (c-h) Relative  
28 quantification of metabolites related in fecal samples (one-way ANOVA; n=8~10/group).  
29 Error bars represent mean  $\pm$  SEM.

30

31 **Figure 6 Administration of inosine reduces METH-induced anxiety and depression related**

32 **behaviours in C57BL/6 mice.** (a) Experimental protocol. (b) Pooled data for time spent in the  
33 centre and (c) total distance in the OFT, (d) the time in the open arm in the EPM, (e) immobile  
34 time in the TST, and (f) FST (n=10/group).

35

36 **Figure 7 An overview of the fecal microbiota of MAs subjects, donor FMT mice or**

37 **recipient FMT mice for the relative abundance of bacterial families.** (a) Log<sub>2</sub> abundance  
38 of the gut microbiota in MAs (n = 15) and HCs (n = 17) at the family level. (b) Comparison  
39 of intestinal microbiota at the family level in FMT-MAs mice (n = 5) and FMT-HCs mice (n



1 = 5). (c-d) Comparison of abundant families among donor mice (n = 10/group) and post-FMT  
2 recipient mice (n = 5/group). A Wilcoxon-test was performed to determine if there were  
3 significant differences.

4

5 **Figure S1** Construction of the METH addiction model. (a) Timeline of the experimental  
6 sequence of locomotor sensitization. (b-c) METH (5mg/kg) treatment increased the locomotor  
7 sensitization and CPP scores in mice indicating the success of mice model establishment. (n  
8 =10 each group).

9

10 **Figure S2** Generation of microbiota depletion mice as GF mice by cocktail antibiotic-treated  
11 and colonization rates post FMT in mice-to-mice. Mice were given water containing  
12 antibiotic cocktail Ampicillin (1g/L), Metronidazole (1g/L), Neomycin(1g/L), and  
13 Vancomycin (0.5g/L) in the drinking water for 14 consecutive days. (a) Evolution of body  
14 weight gain before antibiotic treated (baseline) and after 14 days of antibiotic-treated (ABX).  
15 (b-c) DNA concentration and total DNA relative to the 16S rRNA gene for total bacterial load  
16 (all bacteria) in Saline or ABX group. DNA concentration expressed as ng/ $\mu$ L. (d)  $\alpha$ -diversity  
17 indexes between the two groups. (e) Venn diagrams demonstrating the distribution of the  
18 OTUs shared among donors and recipient mice in mice-to-mice FMT model showed that  
19 most of the bacteria were found approached donor levels post-FMT indicating successful  
20 colonization and established communities from the donor microbiota.

21

22 **Figure S3** Evolution of body weight gain during the drug administration period. (a) Saline or  
23 Metformin treatment did not significantly change the body weight, while METH as well as  
24 METH/Metformin declined significantly with age. (b) Initial body weight and final body  
25 weight in inosine supplement test suggested that mice in METH as well as METH/inosine  
26 group weighed significantly less compared. (n = 10 for each group)

27

28 **Figure S4** The composition of fecal microbiota in the recipient mice. (a) Cladogram  
29 representing taxa enriched in fecal microbiota community of the three groups detected by the  
30 LEfSe tool. (b) Differential bacterial taxonomy selected by LEfSe analysis with LDA  
31 score  $> \square 3$  in fecal microbiota community of the three groups.

32

33

34

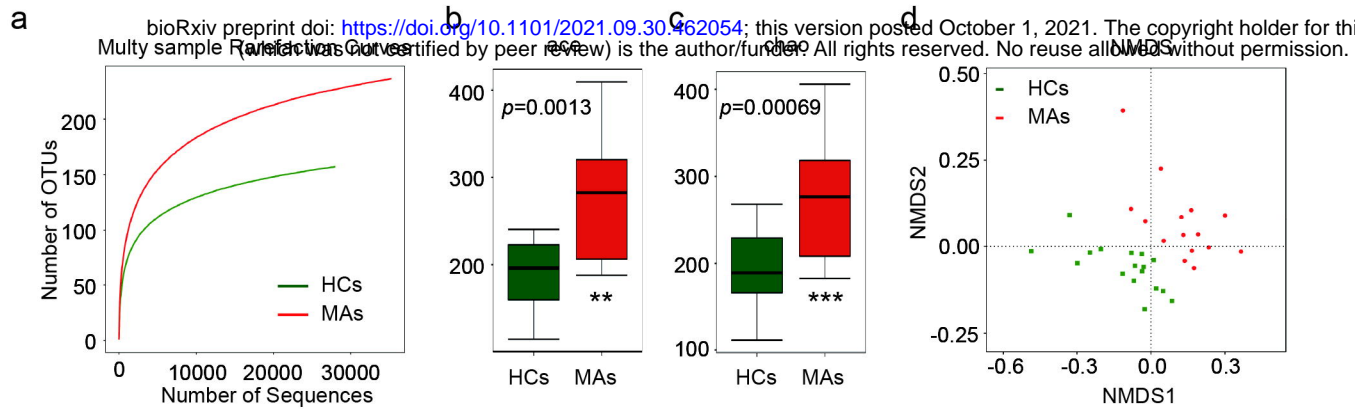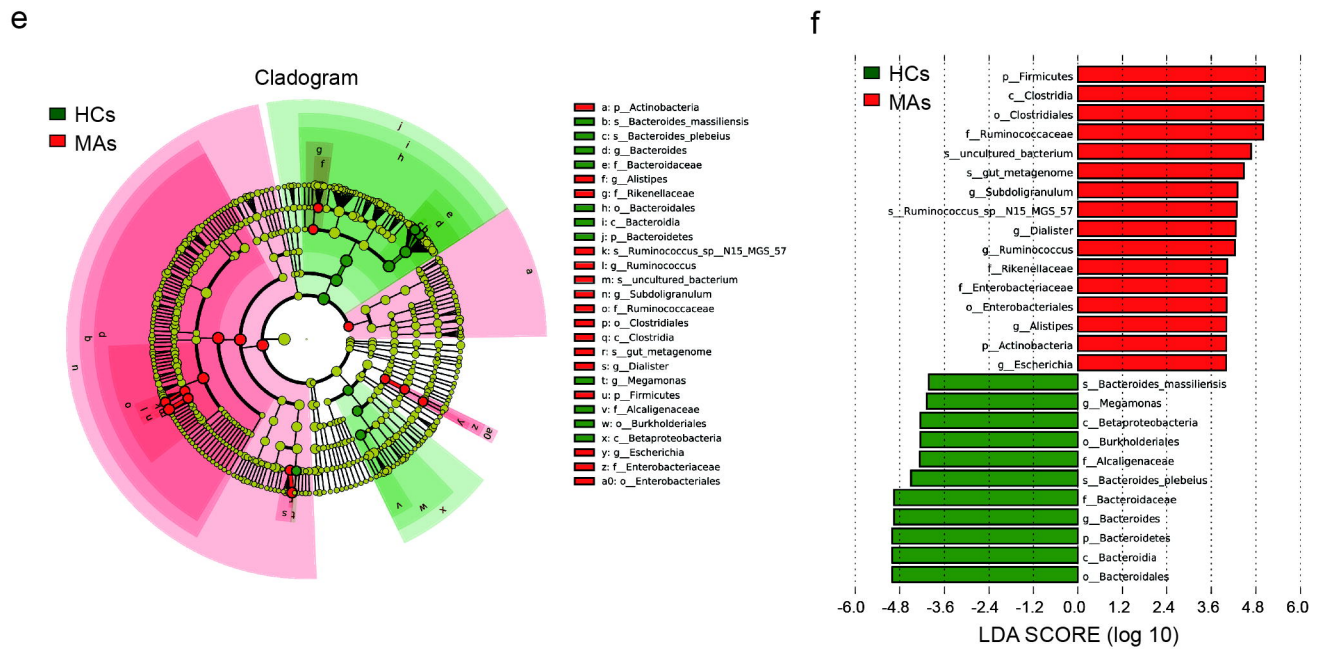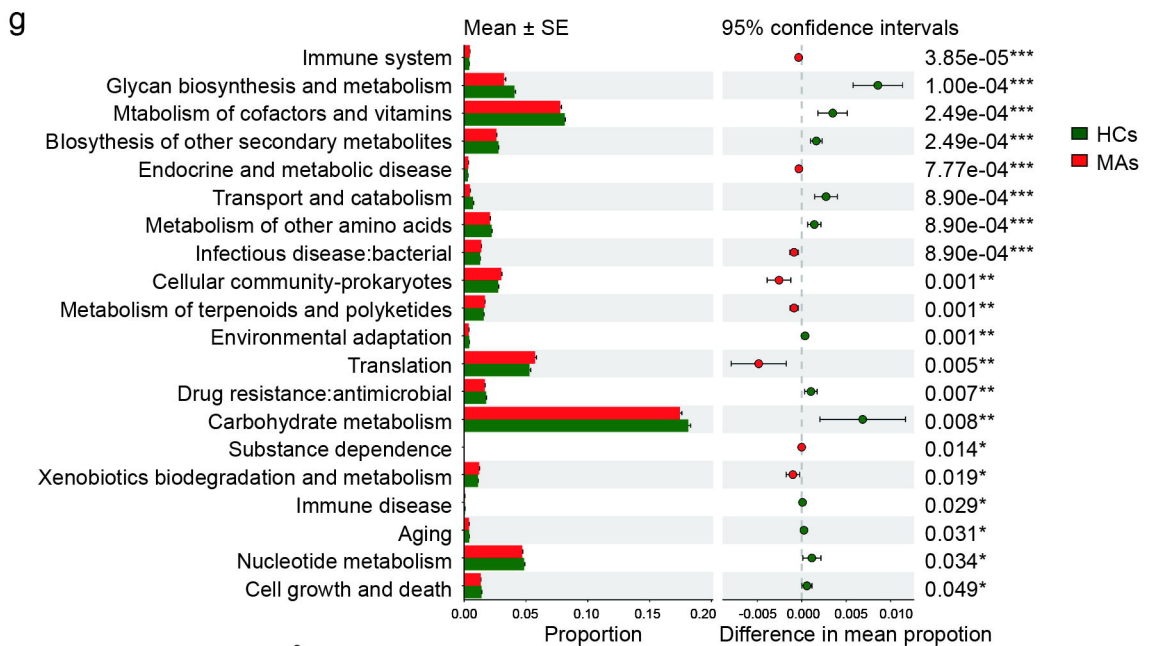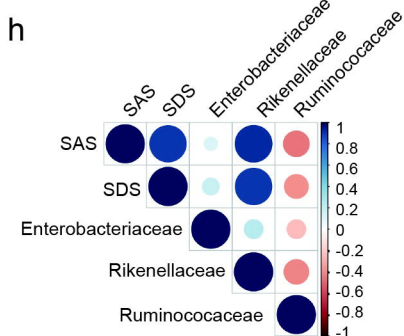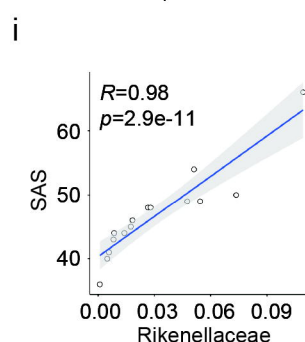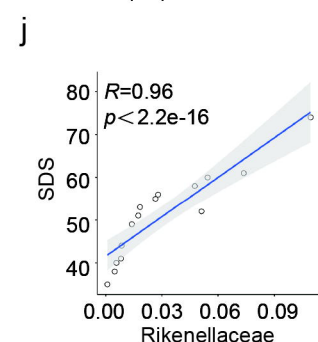

**a**

| Donors | ID | Sex | Age   | METH use years | SAS score | SDS score | Relapse times |
|--------|----|-----|-------|----------------|-----------|-----------|---------------|
| MAs    | 1  | M   | 25-30 | 6 years        | 50        | 57        | 2             |
|        | 2  | M   | 35-40 | 3 years        | 44        | 56        | 2             |
| HCs    | 1  | M   | 25-30 | NA             | 30        | 32        | NA            |
|        | 2  | M   | 35-40 | NA             | 28        | 34        | NA            |

**b**

METH groups:

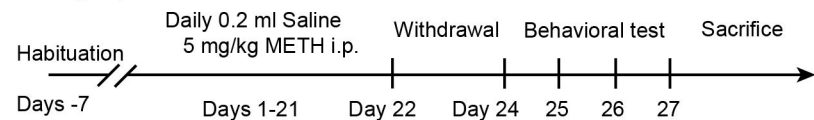

FMT groups:

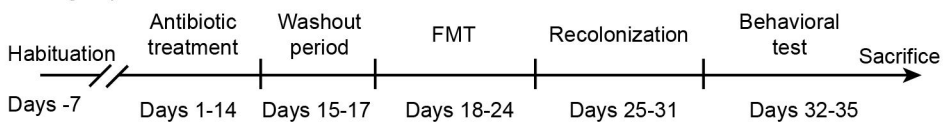**c**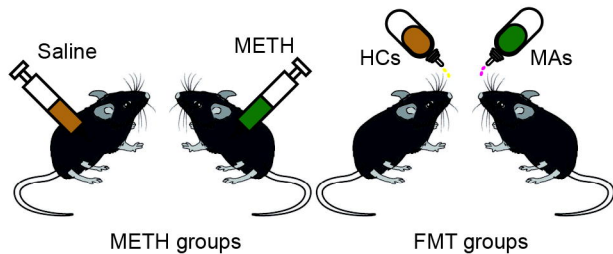**d**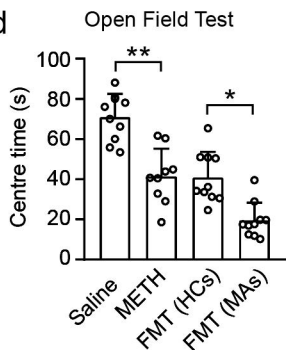**e**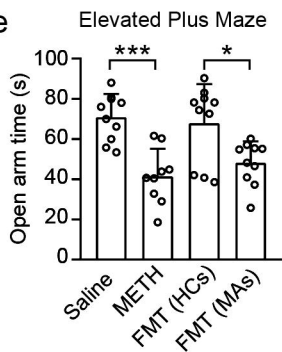**f**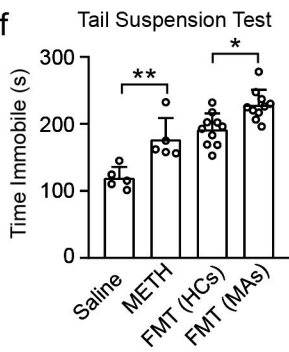**g**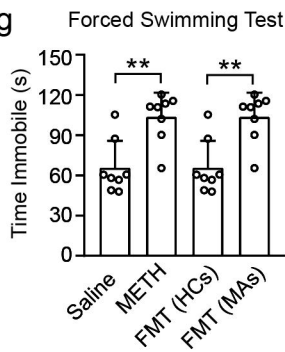

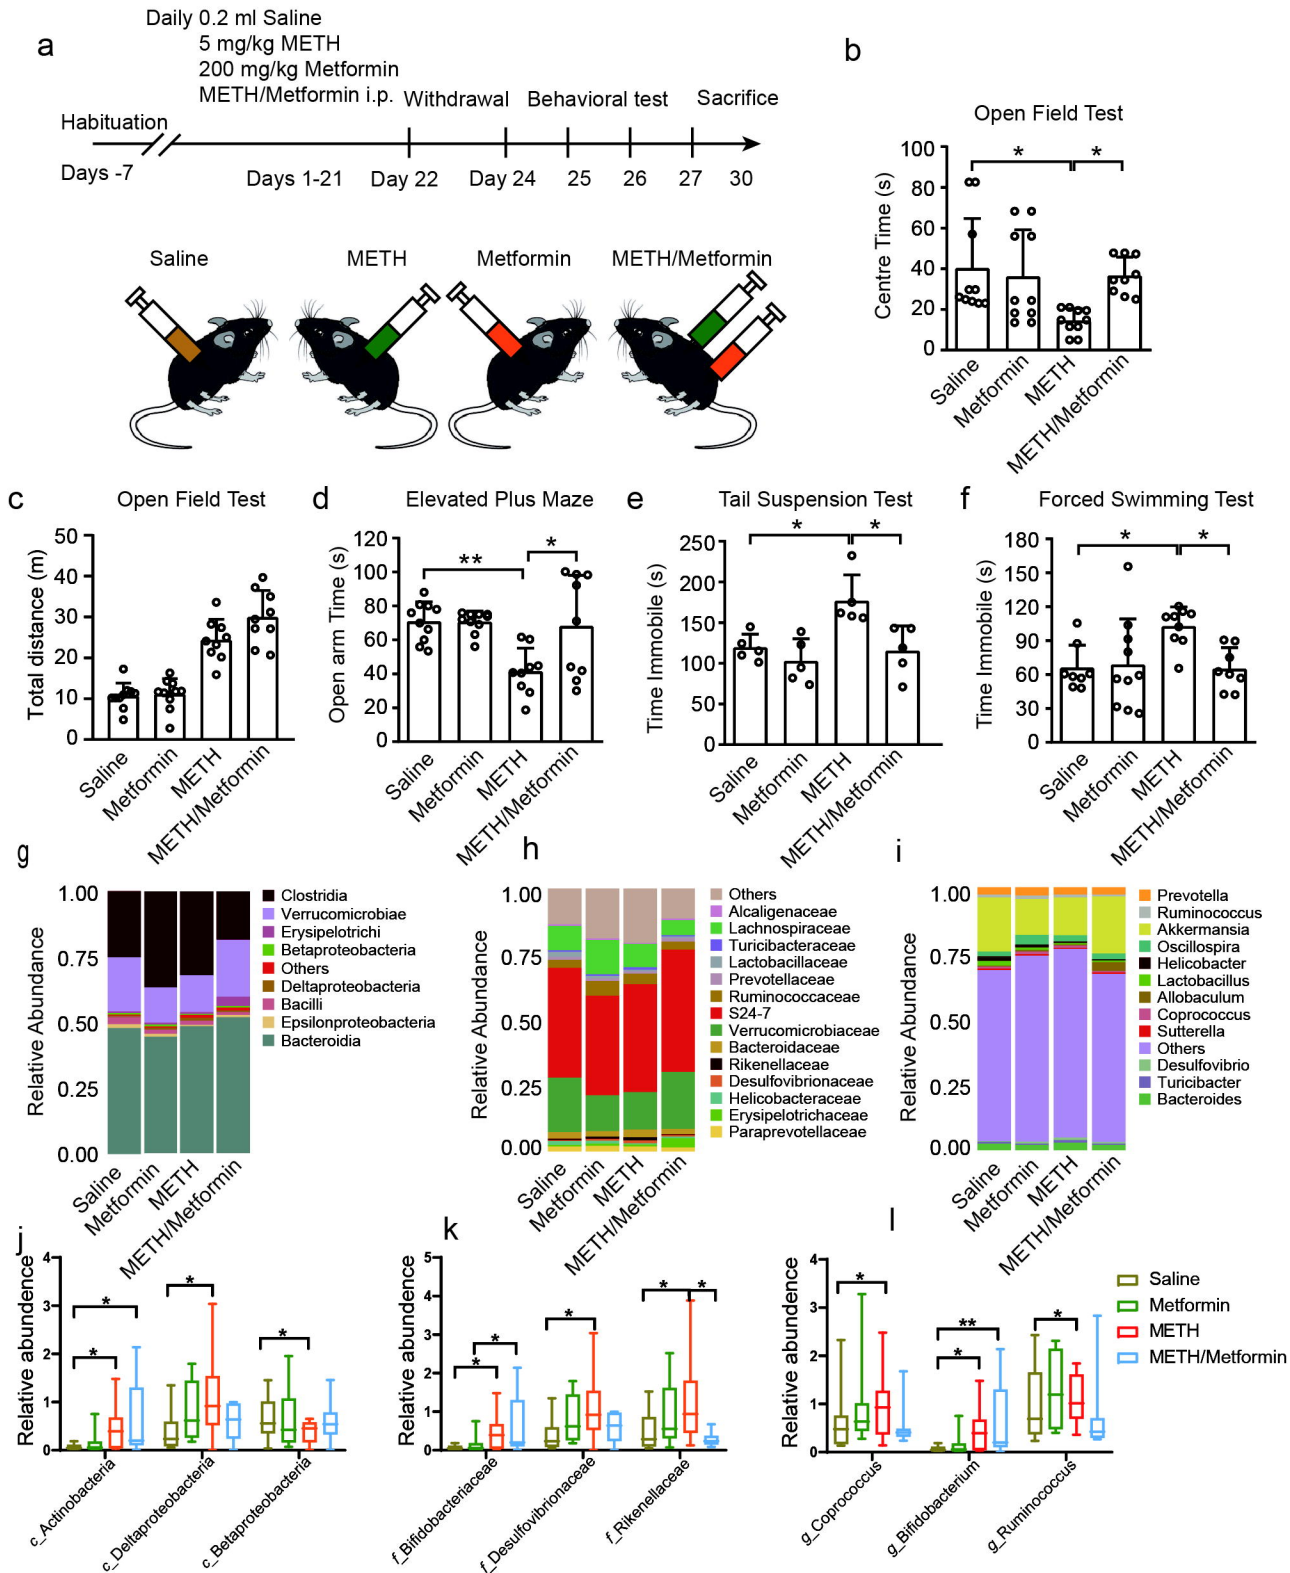

**a**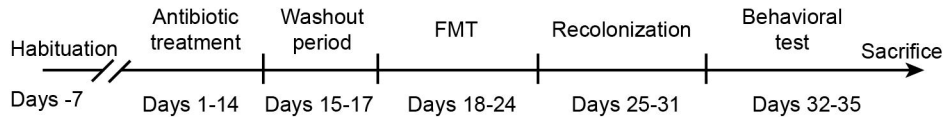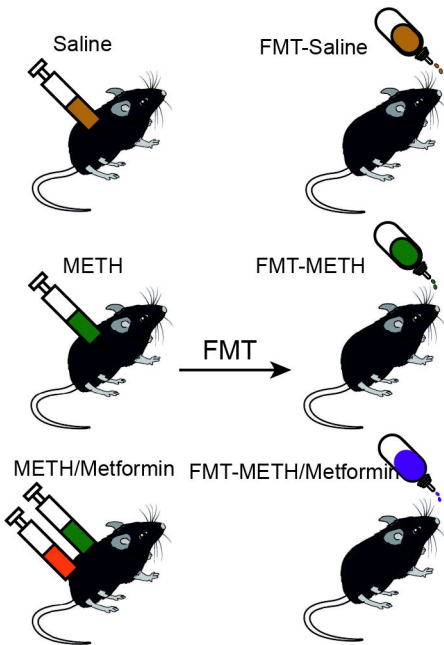**b**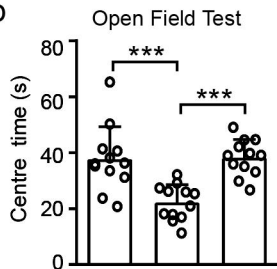**c**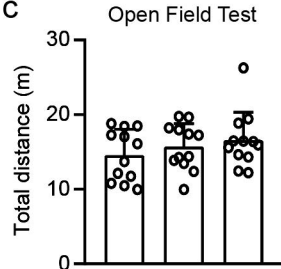**d**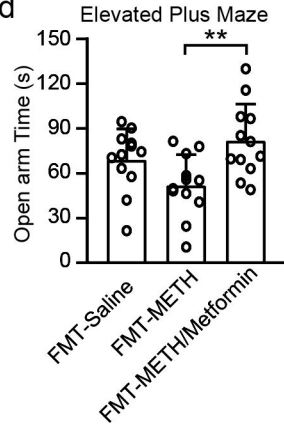**e**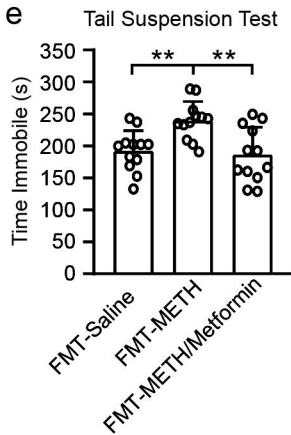**f**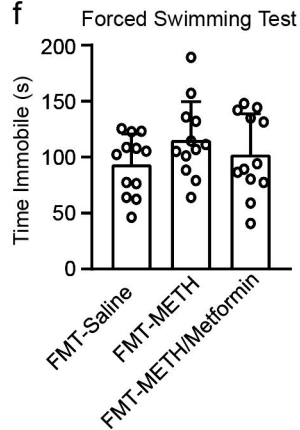

**a**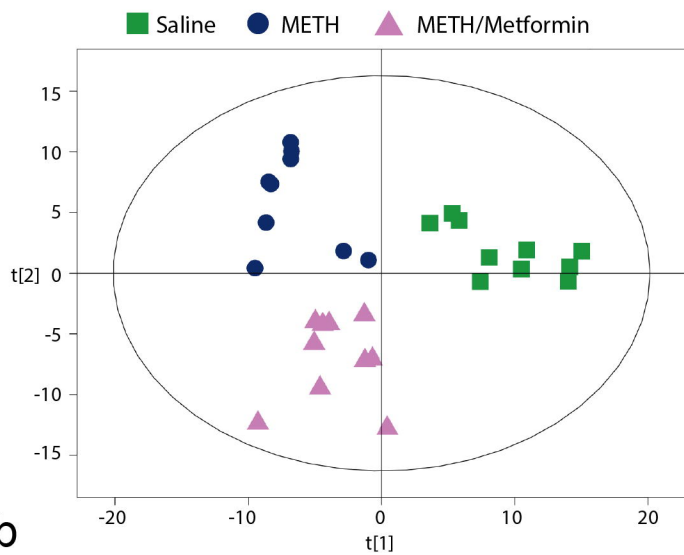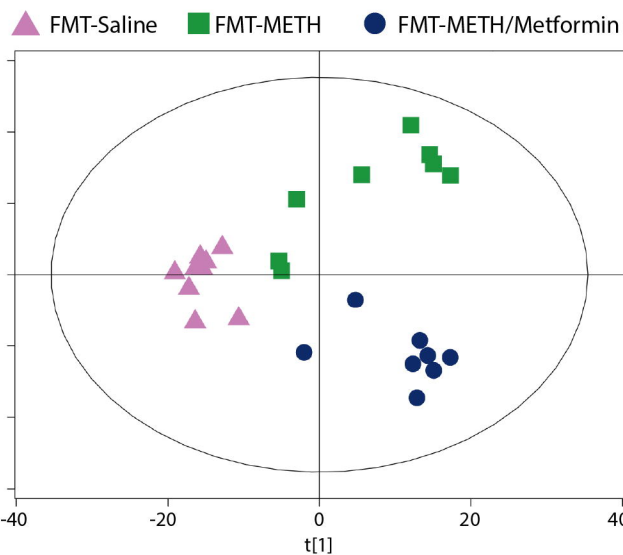**b**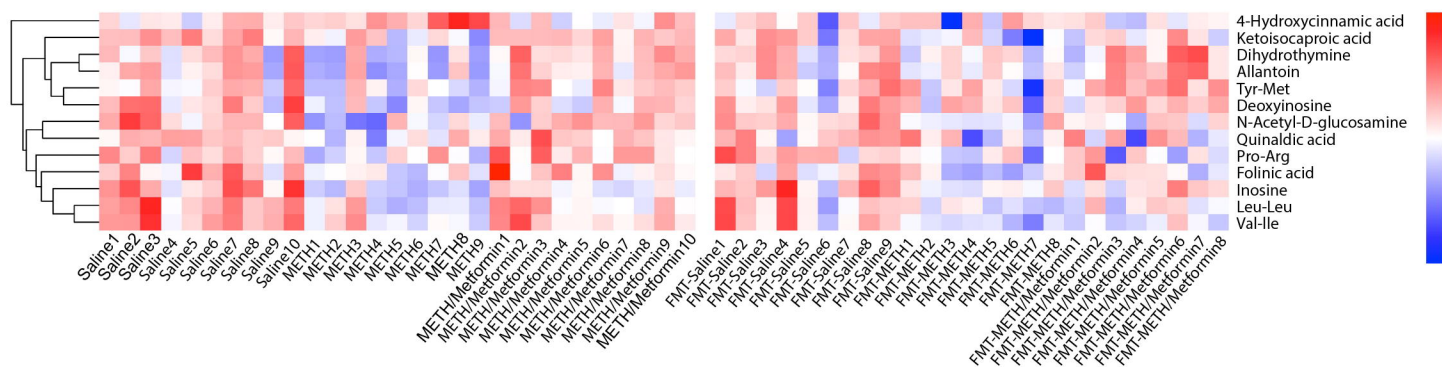**c**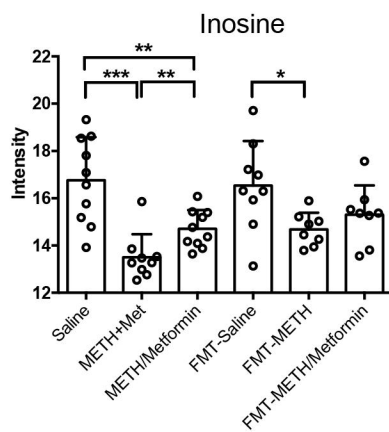**d**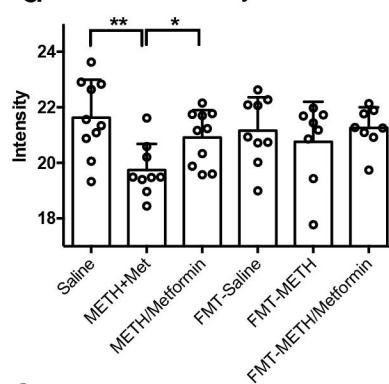**e**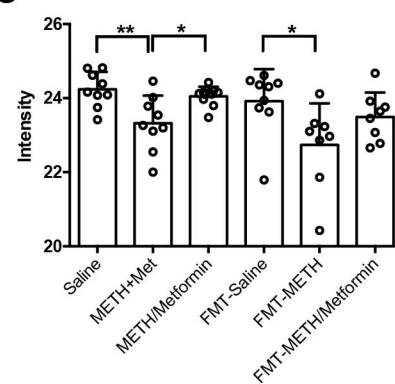**f**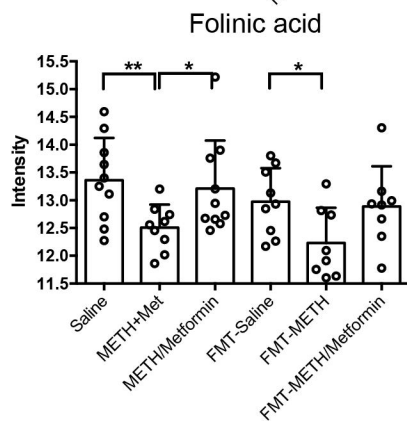**g**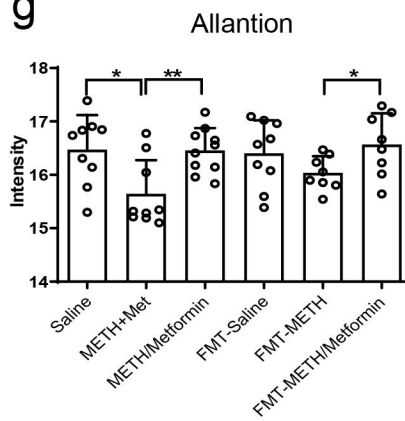**h**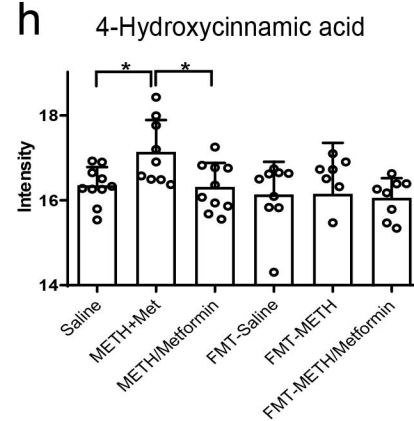

**a**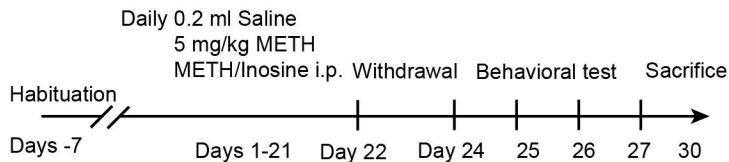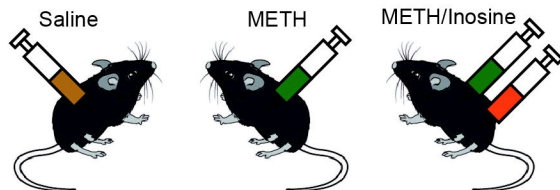**b**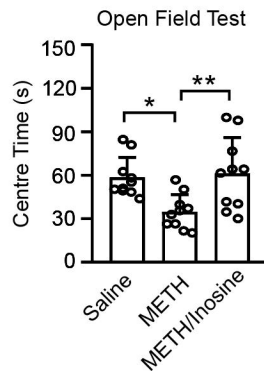**c**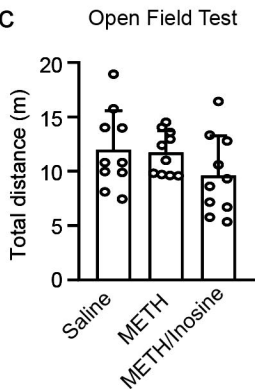**d**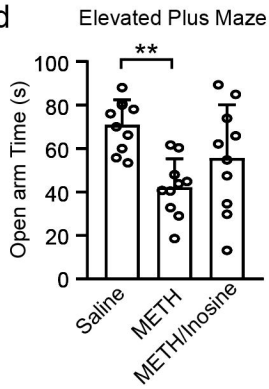**e**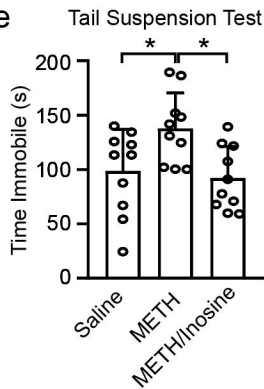**f**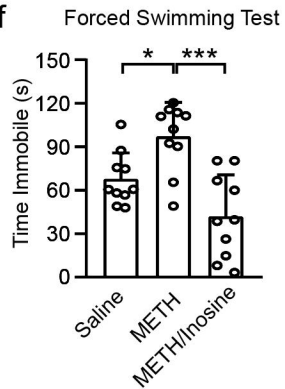

**a**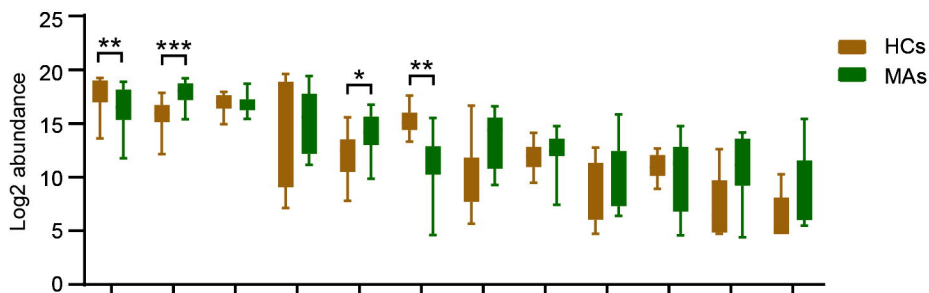**b**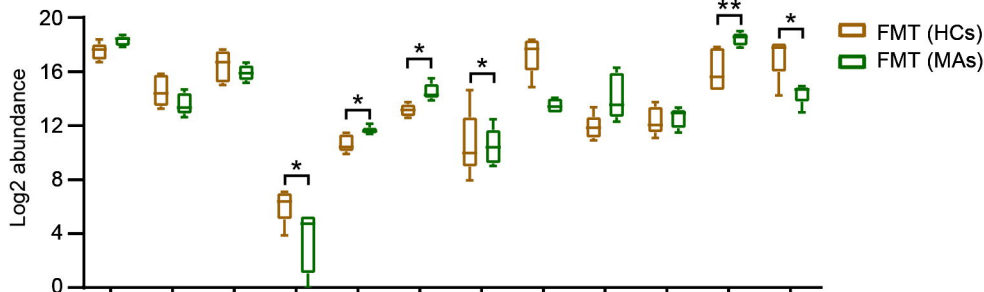**c**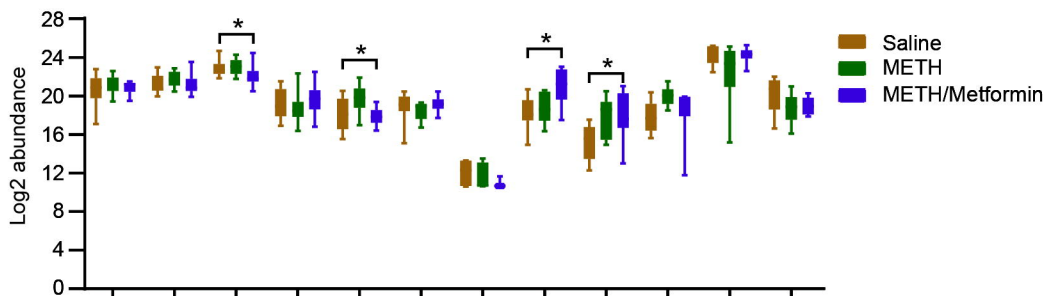**d**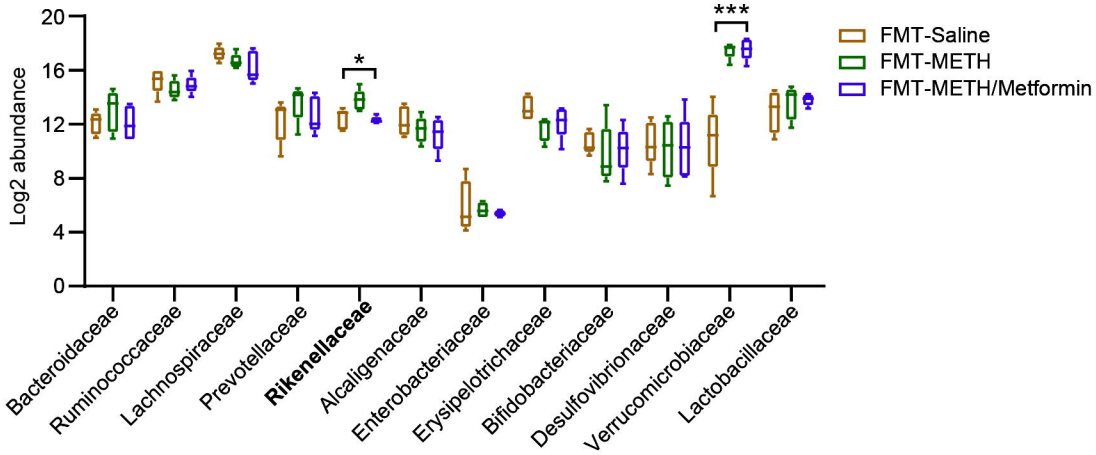

Source: https://biorxiv.org/content/10.1101/2021.09.30.462054v1.full.pdf
